# Supplementary material for: Historical and future changes in air pollutants from CMIP6 models
Source: Copernicus journal article supplement (doi:10.5194/acp-20-14547-2020), 2020-11-30
Supplement: Supplementary file [file acp-20-14547-2020-supplement.pdf]

Supplement of Atmos. Chem. Phys., 20, 14547–14579, 2020  
<https://doi.org/10.5194/acp-20-14547-2020-supplement>  
© Author(s) 2020. This work is distributed under  
the Creative Commons Attribution 4.0 License.

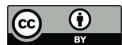

*Supplement of*

## **Historical and future changes in air pollutants from CMIP6 models**

**Steven T. Turnock et al.**

*Correspondence to:* Steven T. Turnock ([steven.turnock@metoffice.gov.uk](mailto:steven.turnock@metoffice.gov.uk))

The copyright of individual parts of the supplement might differ from the CC BY 4.0 License.

## Contents

Table S1 – CMIP6 model details

Figure S1 – Definition of Regions

Figures S2-S7 – Annual and seasonal mean surface O<sub>3</sub> concentrations from individual CMIP6 models compared to observations

Figures S8-S12 – Annual mean PM<sub>2.5</sub> component concentrations in 2005-2014 across the individual CMIP6 models

Figure S13 – Annual and seasonal mean PM<sub>2.5</sub> NO<sub>3</sub> component concentrations in 2005-2014 across the individual CMIP6 models that made the data available

Figure S14 – Annual mean surface O<sub>3</sub> concentrations across CMIP6 models in 2005-14, 1980-89 and 1850-59

Figure S15 – Regional annual mean surface O<sub>3</sub> concentrations across the entire historical period (1850-2014)

Figure S16 – Regional annual and seasonal mean 1850 to 2014 changes in surface O<sub>3</sub> and PM<sub>2.5</sub>

Figure S17 – Historical annual mean regional surface O<sub>3</sub> and NO<sub>x</sub> (NO + NO<sub>2</sub>) concentrations across CMIP6 models

Figure S18 - Regional annual mean 1850 to 2014 changes in surface PM<sub>2.5</sub> component concentrations

Figure S19 – Global plots of annual mean surface O<sub>3</sub> response in ssp370 from 6 CMIP6 models

Figure S20 – Global plots of annual mean surface O<sub>3</sub> response in ssp370-LowNTCF from 5 CMIP6 models

Figure S21 – Global plots of DJF mean surface O<sub>3</sub> response in ssp370 from 6 CMIP6 models

Figure S22 – Annual mean future emissions of biogenic Volatile organic compounds across 5 CMIP6 models

Figure S23 – Annual mean future emissions of isoprene across 5 CMIP6 models

Figure S24-S28 - Annual mean response of PM<sub>2.5</sub> component concentrations in ssp370 across four individual CMIP6 models

**Table S1** – Brief description of the chemistry and aerosol set up within CMIP6 models used in this study

| CMIP6 Model | Horiz. Res.                                                                        | Vert levels (top level)      | Aerosol scheme                                                              | Aerosol Species                                                                                                                                                            | Natural Sources                                                                                                                                                                                                                                                                                                                                                                                                                            | Treatment of SOA                                                                                                                                                                                                                                                                     | Chemistry Scheme                                                                    | Chemistry reactions                                                                                                                                                                                                                      | BVOCs                                                                                                                                                                                                                                                                                                                                            | Model Ref                                                          |
|-------------|------------------------------------------------------------------------------------|------------------------------|-----------------------------------------------------------------------------|----------------------------------------------------------------------------------------------------------------------------------------------------------------------------|--------------------------------------------------------------------------------------------------------------------------------------------------------------------------------------------------------------------------------------------------------------------------------------------------------------------------------------------------------------------------------------------------------------------------------------------|--------------------------------------------------------------------------------------------------------------------------------------------------------------------------------------------------------------------------------------------------------------------------------------|-------------------------------------------------------------------------------------|------------------------------------------------------------------------------------------------------------------------------------------------------------------------------------------------------------------------------------------|--------------------------------------------------------------------------------------------------------------------------------------------------------------------------------------------------------------------------------------------------------------------------------------------------------------------------------------------------|--------------------------------------------------------------------|
| BCC-ESM1    | 2.813° x 2.813°                                                                    | L26 (2.914 hPa)              | Mass-based aerosol scheme. Prescribed stratospheric aerosols.               | SO <sub>4</sub> , BC (hydrophilic and hydrophobic), OM (hydrophilic and hydrophobic), sea salt (4 size bins), dust (4 size bins). No nucleation or coagulation of aerosols | Prescribed DMS seawater concentrations with emissions dependent on wind speed. Online emissions of sea-salt and dust aerosols. NO <sub>x</sub> calculated from lightning.                                                                                                                                                                                                                                                                  | Hydrophilic OC from anthropogenic emissions but also from natural sources calculated using a fixed yield, assumed to be equal to 10% of monoterpene emissions (from land surface model)                                                                                              | CAM-Chem (based on MOZART). Tropospheric only chemistry.                            | 66 gas-phase chemical species with 33 photolytic reactions and 135 kinetic reactions.                                                                                                                                                    | Online biogenic emissions from dynamically evolving vegetation computed in the land model BCC-AVIM2.0 following the algorithm of MEGANv2.1 which has a dependence on light and temperature but also inhibits isoprene emissions based on CO <sub>2</sub> .                                                                                       | (Wu et al., 2020)                                                  |
| CESM2-WACCM | 0.9° x 1.25°                                                                       | L70 (6x10 <sup>-6</sup> hPa) | MAM4 (modal scheme, simulating mass and number concentrations) with VBS-SOA | SO <sub>4</sub> , BC, OM (both primary and secondary), sea salt, dust                                                                                                      | Prescribed climatology of DMS seawater concentrations and emissions. Online emissions of sea-salt and dust aerosols. NO <sub>x</sub> calculated from lightning. Soil NO <sub>x</sub> and ocean CO, VOCs from POET                                                                                                                                                                                                                          | Explicit calculation of SOA using volatility basis set (VBS) where aromatic species, terpenes and isoprene are oxidised to produce a range of gas-phase SOA precursors with different volatilities. Formation of SOA linked to BVOCs emissions from interactive land surface scheme. | MOZART-TSMLT1 covering troposphere, stratosphere, mesosphere and lower thermosphere | 231 gas-phase species, 150 photolytic reactions, 403 kinetic reactions and 30 heterogeneous reactions involving ClO <sub>x</sub> , BrO <sub>x</sub> , NO <sub>x</sub> -HO <sub>x</sub> -O <sub>x</sub> , CO, CH <sub>4</sub> and NMVOCs. | Online biogenic emissions (isoprene, monoterpenes, acetone, methanol, and other short and long-chained hydrocarbons) from dynamically evolving vegetation computed in the Community Land Model (CLM) using the MEGAN2.1 algorithm, which has dependence on light and temperature but also inhibits isoprene emissions based on CO <sub>2</sub> . | (Gettelman et al., 2019; Tilmes et al., 2019; Emmons et al., 2020) |
| CNRM-ESM2-1 | 1.4° x 1.4°                                                                        | L91 (80km)                   | TACTIC_v2. Tropospheric aerosols. Mass based aerosol scheme.                | SO <sub>4</sub> , BC (hydrophilic and hydrophobic), OM (hydrophilic and hydrophobic), sea salt (3 size bins), dust (3 size bins)                                           | Prescribed DMS seawater concentrations. Online emissions of sea-salt and dust aerosols                                                                                                                                                                                                                                                                                                                                                     | Prescribed SOA from monthly inventory                                                                                                                                                                                                                                                | No representation of lower tropospheric chemistry so not considered here.           | N/A                                                                                                                                                                                                                                      | N/A                                                                                                                                                                                                                                                                                                                                              | (Michou et al., 2019; Séférian et al., 2019)                       |
| GFDL-ESM4   | cubed-sphere (c96) grid, with ~100 km native resolution, regridded to 1.0° x 1.25° | L49 (0.01 hPa)               | Bulk mass-based scheme. 5 size bins are used for sea salt and dust.         | NH <sub>4</sub> , SO <sub>4</sub> , NO <sub>3</sub> , NH <sub>4</sub> , BC, OM, sea salt, dust                                                                             | DMS and sea salt emissions calculated online as a function of wind speed (and a prescribed DMS seawater climatology). Dust emissions coupled to interactive vegetation. Lightning NO <sub>x</sub> calculated online as a function of convection. Natural emissions of NO <sub>x</sub> , CO, NMVOCs, H <sub>2</sub> , and NH <sub>3</sub> from POET. NH <sub>3</sub> from seabird colonies. Two-way exchange of NH <sub>3</sub> with ocean. | SOA formed simulated using an anthropogenic source from oxidation of C <sub>4</sub> H <sub>10</sub> tracer and a tracer representing BVOC emissions from vegetation                                                                                                                  | Interactive stratosphere-troposphere                                                | 43 photolysis reactions, 190 gas-phase kinetic reactions and 15 heterogeneous reactions. NO <sub>x</sub> -HO <sub>x</sub> -O <sub>x</sub> - chemical cycles and CO, CH <sub>4</sub> and NMVOC oxidation reactions                        | Online emissions of BVOCs (isoprene and monoterpenes) calculated from a prescribed vegetation cover using MEGAN2.1 algorithm, which has dependence on light and temperature but also inhibits isoprene emissions based on CO <sub>2</sub> .                                                                                                      | (Horowitz et al., 2019; Dunne et al., 2020)                        |

|                 |                                                                                              |                |                                                                                    |                                                                                                                                                                                                                                                                                                        |                                                                                                                                                                                                                                                                               |                                                                                                                                                       |                                                                                                                |                                                                                                                                                                                                                                                                                                                                       |                                                                                                                                                                                                                                                       |                                                   |
|-----------------|----------------------------------------------------------------------------------------------|----------------|------------------------------------------------------------------------------------|--------------------------------------------------------------------------------------------------------------------------------------------------------------------------------------------------------------------------------------------------------------------------------------------------------|-------------------------------------------------------------------------------------------------------------------------------------------------------------------------------------------------------------------------------------------------------------------------------|-------------------------------------------------------------------------------------------------------------------------------------------------------|----------------------------------------------------------------------------------------------------------------|---------------------------------------------------------------------------------------------------------------------------------------------------------------------------------------------------------------------------------------------------------------------------------------------------------------------------------------|-------------------------------------------------------------------------------------------------------------------------------------------------------------------------------------------------------------------------------------------------------|---------------------------------------------------|
| GISS-E2-1-G     | 2° x 2.5°                                                                                    | L40 (0.1 hPa)  | OMA (one moment aerosol scheme – mass based)                                       | SO <sub>4</sub> , NO <sub>3</sub> , NH <sub>4</sub> , BC, OM treated as externally mixed with prescribed and constant size distribution. Sea salt has two size classes. Sectional scheme for dust with 5 size bins that can be coated with SO <sub>4</sub> and NO <sub>3</sub> to increase solubility. | Sea salt, DMS, isoprene and dust emission fluxes are calculated interactively. Online NO <sub>x</sub> calculated from lightning. Soil NO <sub>x</sub> , ocean CO, VOCs from GEIA. NH <sub>3</sub> from oceans. SO <sub>2</sub> from volcanoes as in AeroCom.                  | Two-product model approximation to represent SOA formation from the oxidation of biogenic VOCs, including NO <sub>x</sub> dependent chemistry yields. | Coupled troposphere-stratosphere chemistry scheme. Modified Carbon Bond Mechanism 4 (CBM-4) chemical mechanism | inorganic chemistry of O <sub>x</sub> , NO <sub>x</sub> , HO <sub>x</sub> , CO, and organic chemistry of CH <sub>4</sub> and lumped higher hydrocarbons (only isoprene and terpenes are explicitly taken into account), along with Cl and Br stratospheric chemistry and heterogenous reactions on PSCs and SO <sub>4</sub> aerosols. | Emissions of isoprene from dynamically evolving vegetation are calculated interactively using the algorithm of Guenther et al., (1995), which has dependence on light and temperature. Terpene emissions are prescribed.                              | (Bauer et al., 2020)                              |
| HadGEM3-GC31-LL | 1.25° x 1.875°                                                                               | L85 (85km)     | GLOMAP-Mode. (Modal scheme, mass and number). Mass based bin scheme used for dust. | SO <sub>4</sub> , BC, OM, sea salt in 5 log-normal modes and dust in 6 bins                                                                                                                                                                                                                            | Prescribed climatologies of DMS seawater concentrations and BVOC emissions. No marine source of primary organics. Online emissions of sea-salt and dust aerosols                                                                                                              | Fixed yield of SOA of 26% calculated from gas-phase oxidation reactions involving prescribed land-based monoterpene sources                           | Simplified sulphur chemistry for use with aerosol scheme                                                       | Oxidation for SO <sub>4</sub> and simplified oxidation scheme (monoterpenes) for SOA                                                                                                                                                                                                                                                  | N/A                                                                                                                                                                                                                                                   | (Mulcahy et al., 2020)                            |
| MIROC6-ES2L     | 2.813° x 2.813°                                                                              | L40 (3.0 hPa)  | SPRINTAS.                                                                          | SO <sub>4</sub> , BC, OM, sea salt and dust in log-normal size distributions. External mixing assumed for SO <sub>4</sub> , sea salt and dust aerosols.                                                                                                                                                | Online emissions of DMS, sea-salt and dust aerosols. Primary marine organic aerosol emissions coupled to ocean biogeochemistry.                                                                                                                                               | Prescribed emissions of isoprene and terpenes from GEIA used to convert to secondary organic carbon.                                                  | Simplified chemistry for use with aerosol scheme                                                               | Oxidation for SO <sub>4</sub> and simplified oxidation scheme (isoprene and monoterpenes) for SOA                                                                                                                                                                                                                                     | Prescribed emissions of isoprene and terpenes from GEIA.                                                                                                                                                                                              | (Takemura, 2012; Hajima et al., 2020)             |
| MPI-ESM1.2-HAM  | 1.875° x 1.875°                                                                              | L47 (0.01 hPa) | HAM2.3 (Modal scheme, mass and number)                                             | SO <sub>4</sub> , BC, OM, sea salt, dust in 7 log-normal modes                                                                                                                                                                                                                                         | Interactive online emissions of DMS (using prescribed sea water concentrations), sea-salt and dust aerosols dependent on meteorology.                                                                                                                                         | 15% of natural terpene emissions at the surface (prescribed) form SOA. SOA have identical properties to primary organic aerosols                      | Simplified sulphur chemistry. Other fields prescribed.                                                         | Reactions involving SO <sub>2</sub> , DMS and SO <sub>4</sub> , including aqueous phase.                                                                                                                                                                                                                                              | N/A                                                                                                                                                                                                                                                   | (Tegen et al., 2019)                              |
| MRI-ESM2-0      | MRI-AGCM3.5: 1.125° x 1.125°, MASINGAR mk-2r4c: 1.875° x 1.875°, MRI-CCM2.1: 2.813° x 2.813° | L80 (0.01 hPa) | MASINGAR mk-2r4c                                                                   | Mass-based scheme with externally mixed size distributions. SO <sub>4</sub> (three categories), BC (hydrophilic and hydrophobic), OM (hydrophilic and hydrophobic), sea salt (10 size bins), dust (10 size bins).                                                                                      | Interactive online emissions of DMS (using prescribed Climatological DMS sea water concentrations), sea-salt, and dust aerosols dependent on meteorology. Online NO <sub>x</sub> calculated from lightning. Climatological soil NO <sub>x</sub> and ocean CO, VOCs emissions. | No explicit calculation: 14% of prescribed monoterpene and 1.68 % of isoprene emissions are assumed to form SOA.                                      | Chemistry Climate Model version 2.1 (MRI-CCM2.1) covering troposphere, stratosphere, and mesosphere            | 90 chemical species and 259 chemical reactions (184 gas-phase reactions, 59 photolysis reactions, and 16 heterogeneous reactions) involving HO <sub>x</sub> -NO <sub>x</sub> -CH <sub>4</sub> -CO cycles and NMVOC oxidation reactions, and halogen chemistry (Cl and Br)                                                             | Climatological BVOCs emissions                                                                                                                                                                                                                        | (Deushi and Shibata, 2011; Yukimoto et al., 2019) |
| NorESM2-LM      | 1.9° x 2.5°                                                                                  | L32 (3.64 hPa) | OsloAero6                                                                          | SO <sub>4</sub> , BC, OM, sea salt, dust. (log-normal modes)                                                                                                                                                                                                                                           | Interactive emissions for sea-salt, biogenic primary OM (including MSA) and DMS over oceans, and interactive mineral dust and BVOC over land                                                                                                                                  | Fixed SOA formation yields of 15% and 5% from oxidation of monoterpenes and isoprene                                                                  | Simplified chemistry for use in aerosol scheme. Other fields prescribed.                                       | Oxidation for SO <sub>4</sub> and simplified oxidation scheme (isoprene and monoterpenes) for SOA                                                                                                                                                                                                                                     | Online biogenic emissions from dynamically evolving vegetation computed in the Community Land Model (CLM) using the MEGAN2.1 algorithm, which has dependence on light and temperature but also inhibits isoprene emissions based on CO <sub>2</sub> . | (Kirkevåg et al., 2018; Seland et al., 2020)      |



|             |                |            |                                                                                    |                                                                             |                                                                                                                                                                                                                                                                                                            |                                                                                                                 |                                                               |                                                                                                                                                                                                                           |                                                                                                                                                                                                                                                                                                                                                |                                                |
|-------------|----------------|------------|------------------------------------------------------------------------------------|-----------------------------------------------------------------------------|------------------------------------------------------------------------------------------------------------------------------------------------------------------------------------------------------------------------------------------------------------------------------------------------------------|-----------------------------------------------------------------------------------------------------------------|---------------------------------------------------------------|---------------------------------------------------------------------------------------------------------------------------------------------------------------------------------------------------------------------------|------------------------------------------------------------------------------------------------------------------------------------------------------------------------------------------------------------------------------------------------------------------------------------------------------------------------------------------------|------------------------------------------------|
| UKESM1-0-LL | 1.25° x 1.875° | L85 (85km) | GLOMAP-Mode. (Modal scheme, mass and number). Mass based bin scheme used for dust. | SO <sub>4</sub> , BC, OM, sea salt in 5 log-normal modes and dust in 6 bins | Dynamic vegetation and interactive ocean biogeochemistry used for online emissions of DMS, sea-salt and dust aerosols, as well as emissions of primary marine organics and biogenic organic compounds. Online NO <sub>x</sub> calculated from lightning, soil NO <sub>x</sub> and ocean CO, VOCs from POET | Fixed SOA yield of 26% from gas-phase oxidation reactions involving interactive land-based monoterpene sources. | UKCA coupled stratosphere-troposphere. Interactive photolysis | 84 chemical tracers. Simulates chemical cycles of Ox, HOx and NO <sub>x</sub> , as well as oxidation reactions of CO, CH <sub>4</sub> and NMVOCs. In addition, heterogeneous processes, Cl and Br chemistry are included. | Dynamic vegetation and land surface model used to calculate interactive emissions of Isoprene and monoterpenes using light and temperature, but isoprene emissions are inhibited based on CO <sub>2</sub> . Isoprene emissions coupled to chemistry and affect tropospheric O <sub>3</sub> and methane lifetime. Monoterpenes only affect SOA. | (Archibald et al., 2020; Mulcahy et al., 2020) |
|-------------|----------------|------------|------------------------------------------------------------------------------------|-----------------------------------------------------------------------------|------------------------------------------------------------------------------------------------------------------------------------------------------------------------------------------------------------------------------------------------------------------------------------------------------------|-----------------------------------------------------------------------------------------------------------------|---------------------------------------------------------------|---------------------------------------------------------------------------------------------------------------------------------------------------------------------------------------------------------------------------|------------------------------------------------------------------------------------------------------------------------------------------------------------------------------------------------------------------------------------------------------------------------------------------------------------------------------------------------|------------------------------------------------|

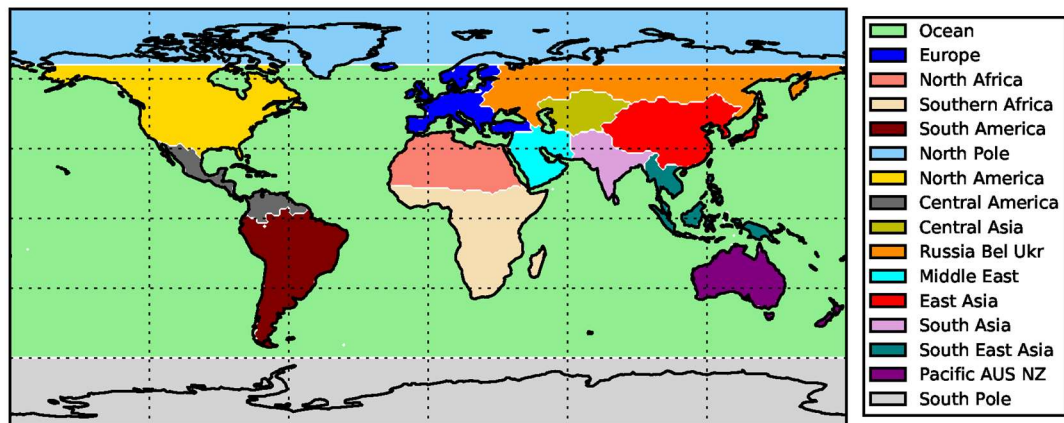

Figure S1 – Definition of regions used in the study, based on those used in Phase 2 of the Hemispheric Transport of Air Pollutants (HTAP2)

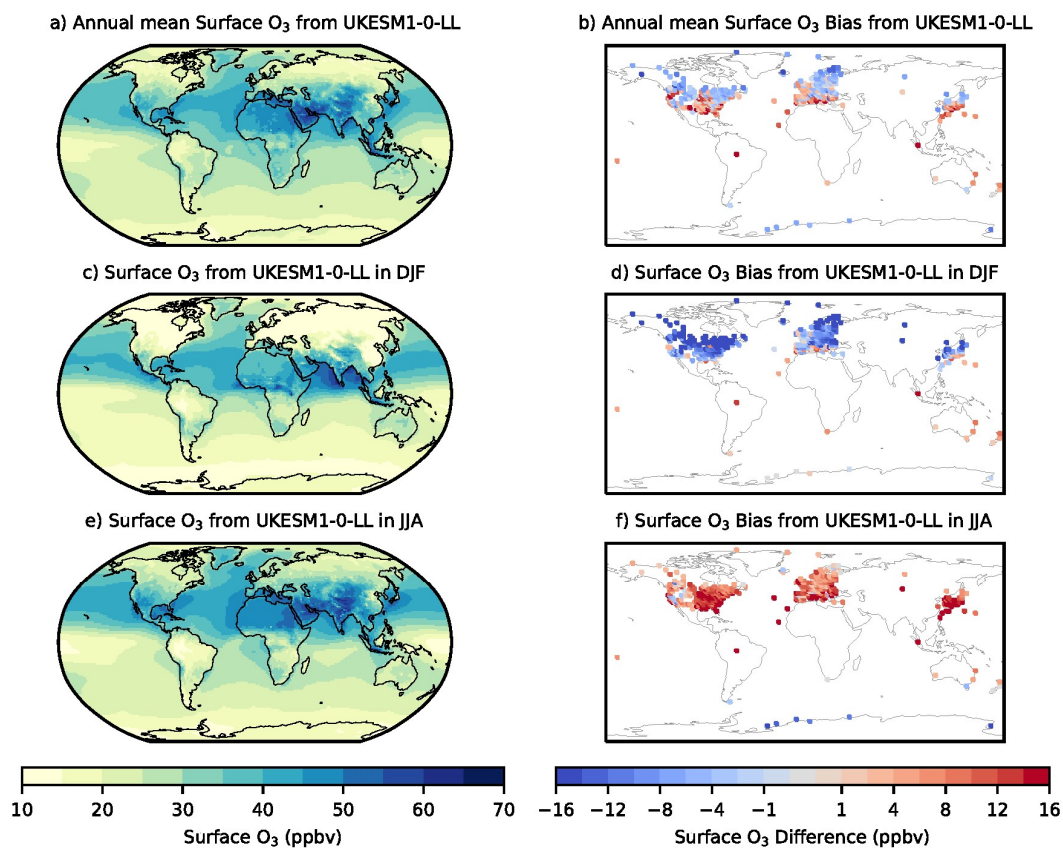

50 Figure S2 – Annual and seasonal mean surface O<sub>3</sub> concentrations from UKESM1-0-LL in a) Annual mean, c) December January, February (DJF) and e) June, July, August (JJA) over the 2005-2014 period. Difference between the UKESM1 mean and TOAR observations for b) Annual mean, d) DJF and f) JJA.

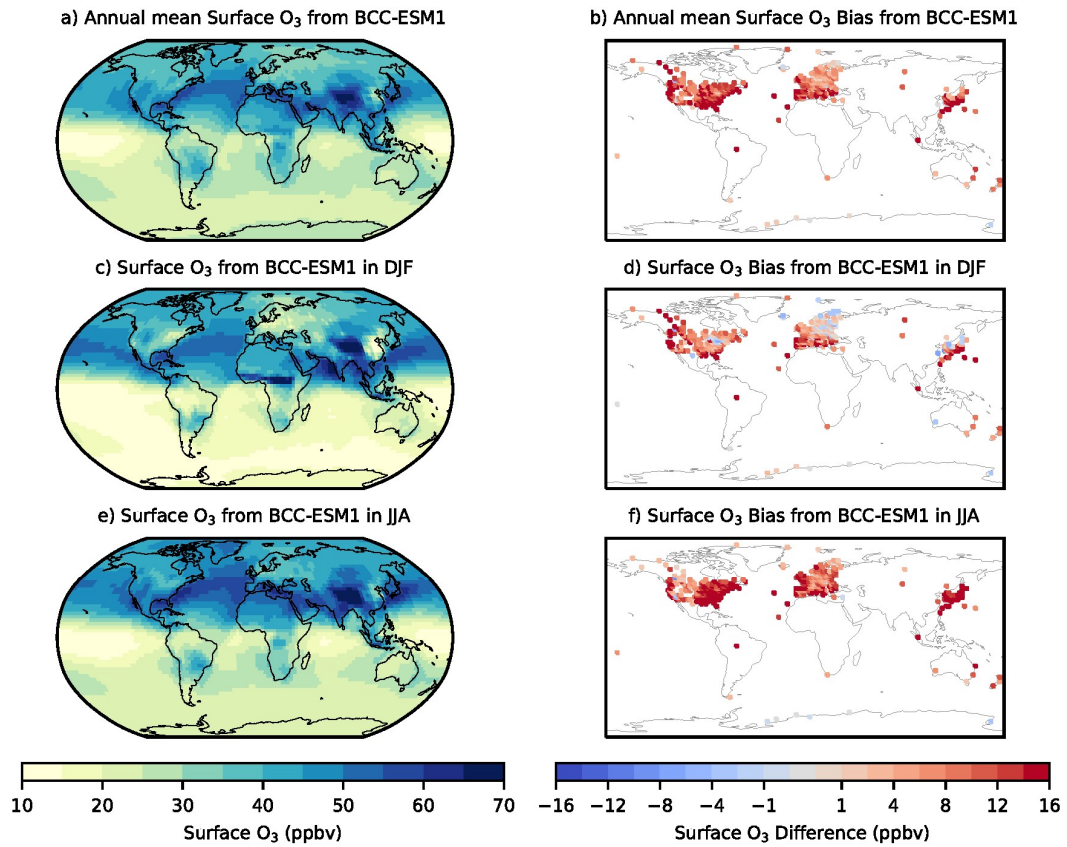

55 **Figure S3 – Annual and seasonal mean surface O<sub>3</sub> concentrations from BCC-ESM1 in a) annual mean, c) December January, February (DJF) and e) June, July, August (JJA) over the 2005-2014 period. Difference between the BCC-ESM1 mean and TOAR observations for b) annual mean, d) DJF and f) JJA.**

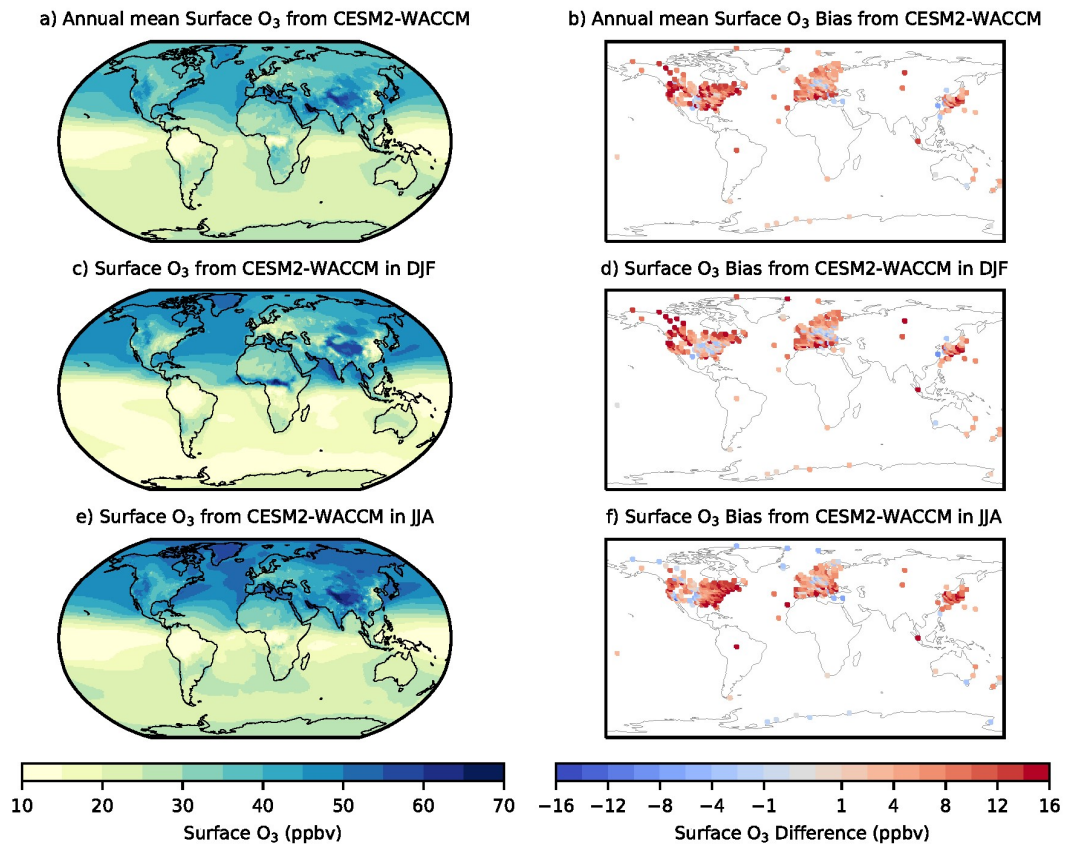

60 **Figure S4 – Annual and seasonal mean surface O<sub>3</sub> concentrations from CESM2-WACCM in a) annual mean, c) December January, February (DJF) and e) June, July, August (JJA) over the 2005-2014 period. Difference between the CESM2-WACCM mean and TOAR observations for b) Annual mean, d) DJF and f) JJA.**

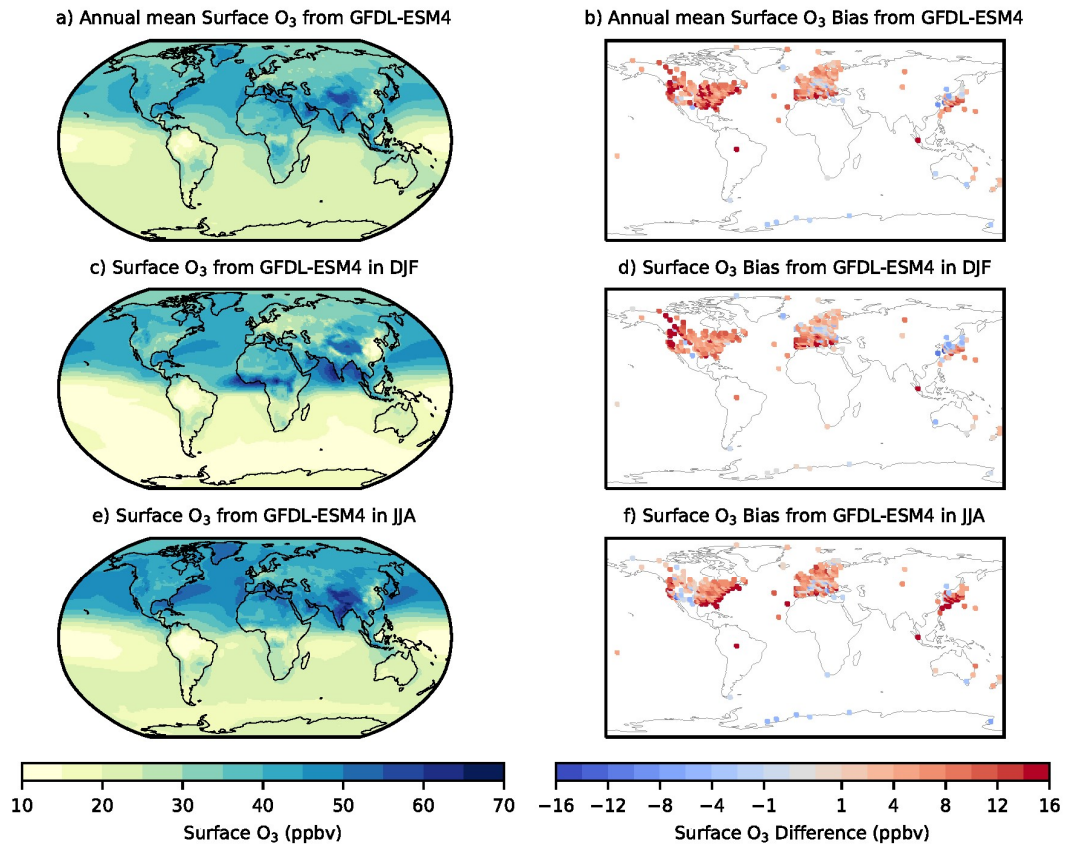

65 **Figure S5** – Annual and seasonal mean surface O<sub>3</sub> concentrations from GFDL-ESM4 in a) Annual mean, c) December January, February (DJF) and e) June, July, August (JJA) over the 2005-2014 period. Difference between the GFDL-ESM4 mean and TOAR observations for b) Annual mean, d) DJF and f) JJA.

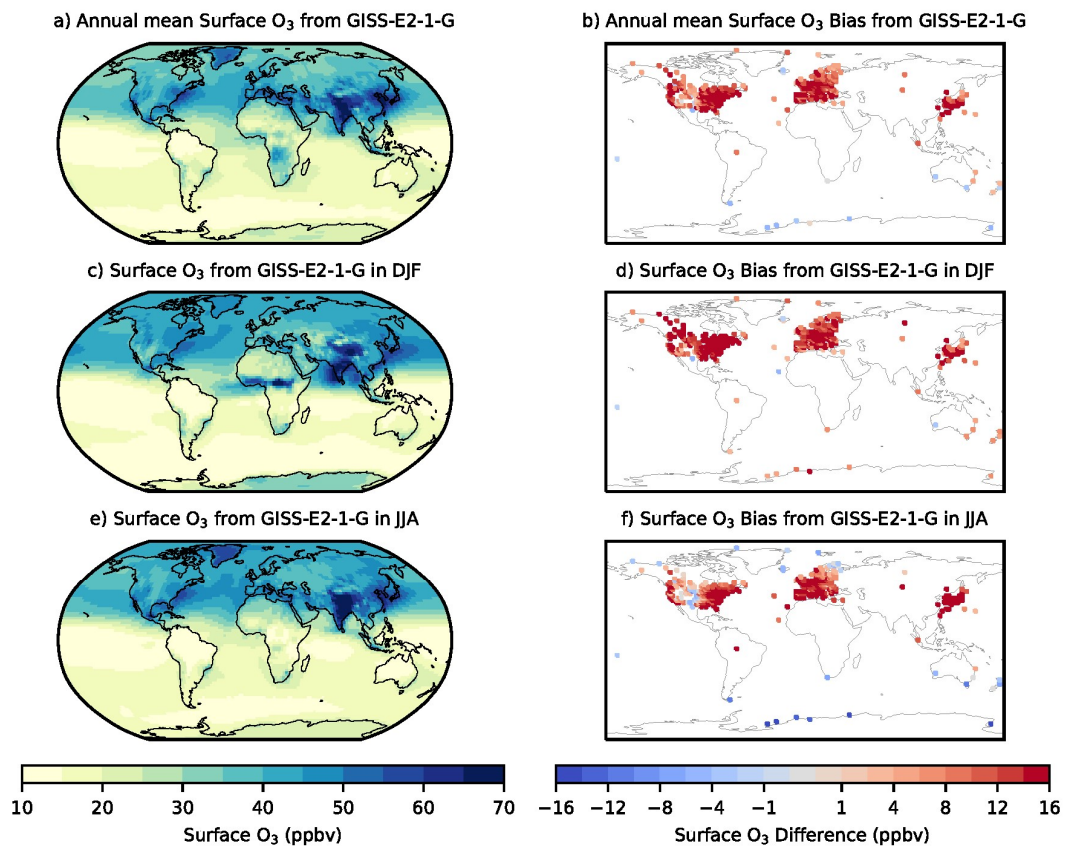

**Figure S6** – Annual and seasonal mean surface O<sub>3</sub> concentrations from GISS-E2-1-G in a) Annual mean, c) December January, February (DJF) and e) June, July, August (JJA) over the 2005-2014 period. Difference between the GISS-E2-1-G mean and TOAR observations for b) Annual mean, d) DJF and f) JJA.



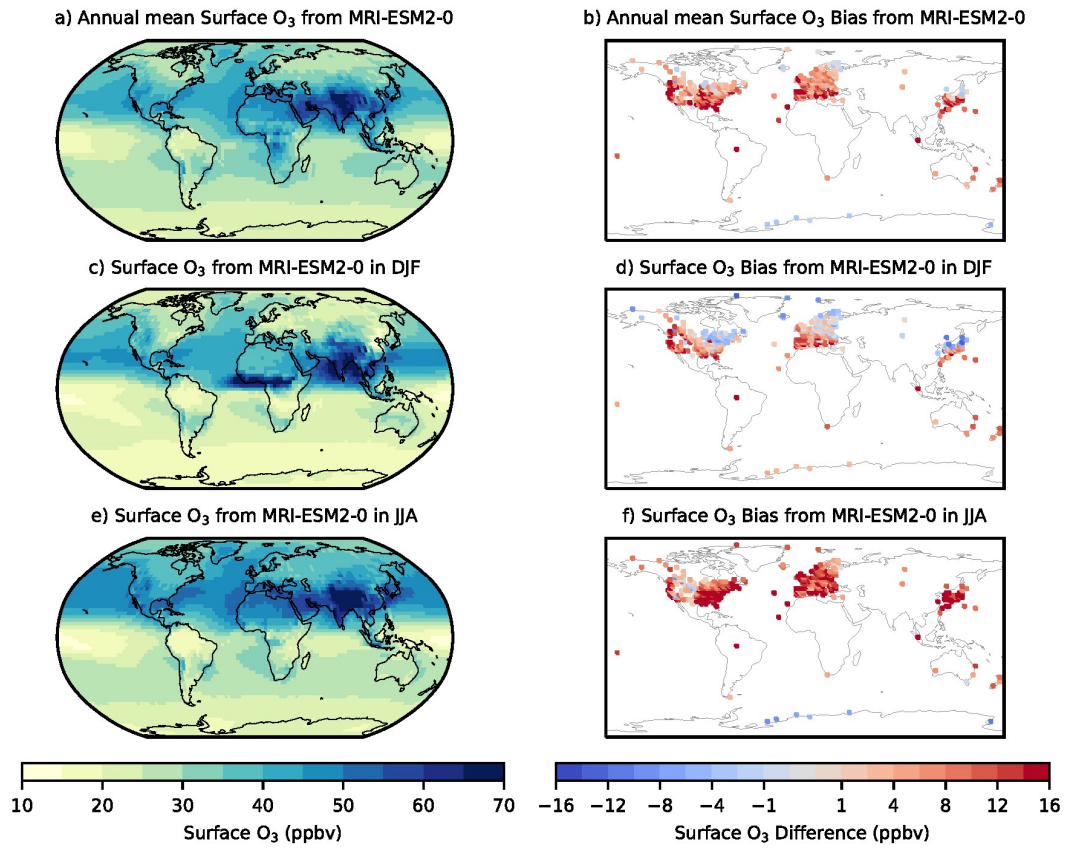

70

Figure S7 – Annual and seasonal mean surface O<sub>3</sub> concentrations from MRI-ESM2-0 in a) Annual mean, c) December January, February (DJF) and e) June, July, August (JJA) over the 2005-2014 period. Difference between the MRI-ESM2-0 mean and TOAR observations for b) Annual mean, d) DJF and f) JJA.

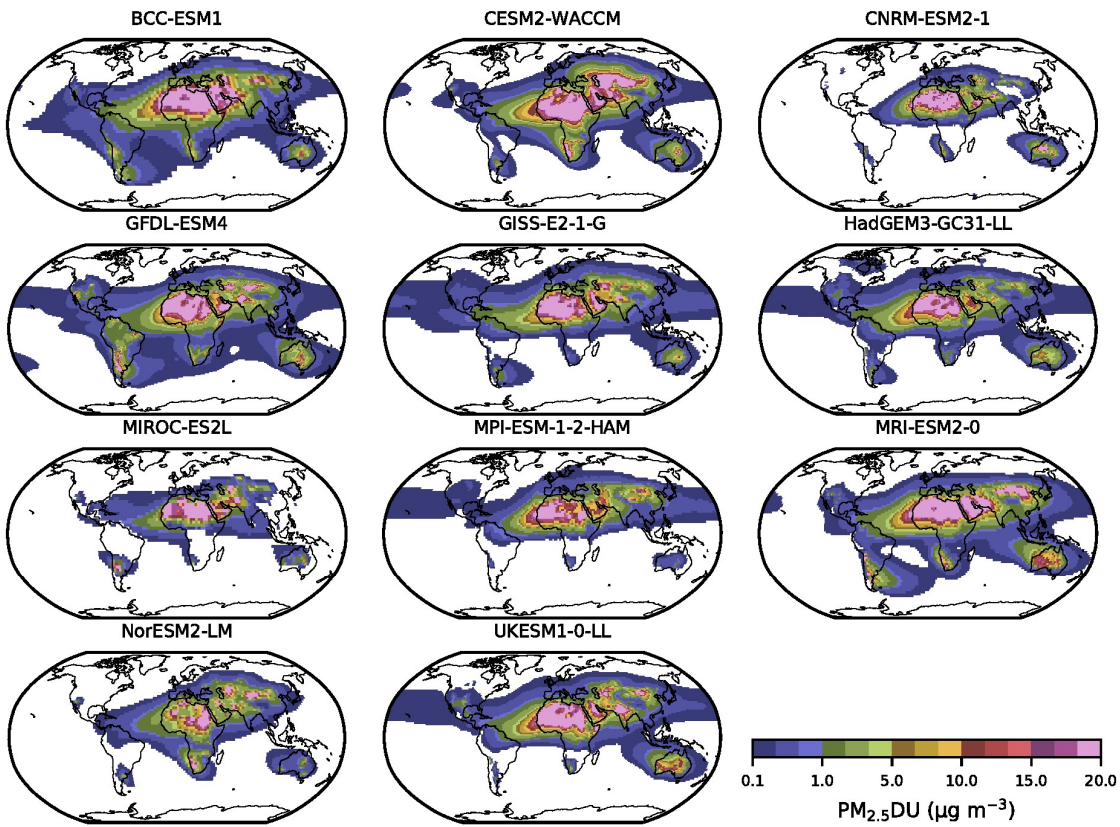

75 Figure S8 – Annual mean PM<sub>2.5</sub> dust component calculated for each individual CMIP6 model over the period 2005-2014

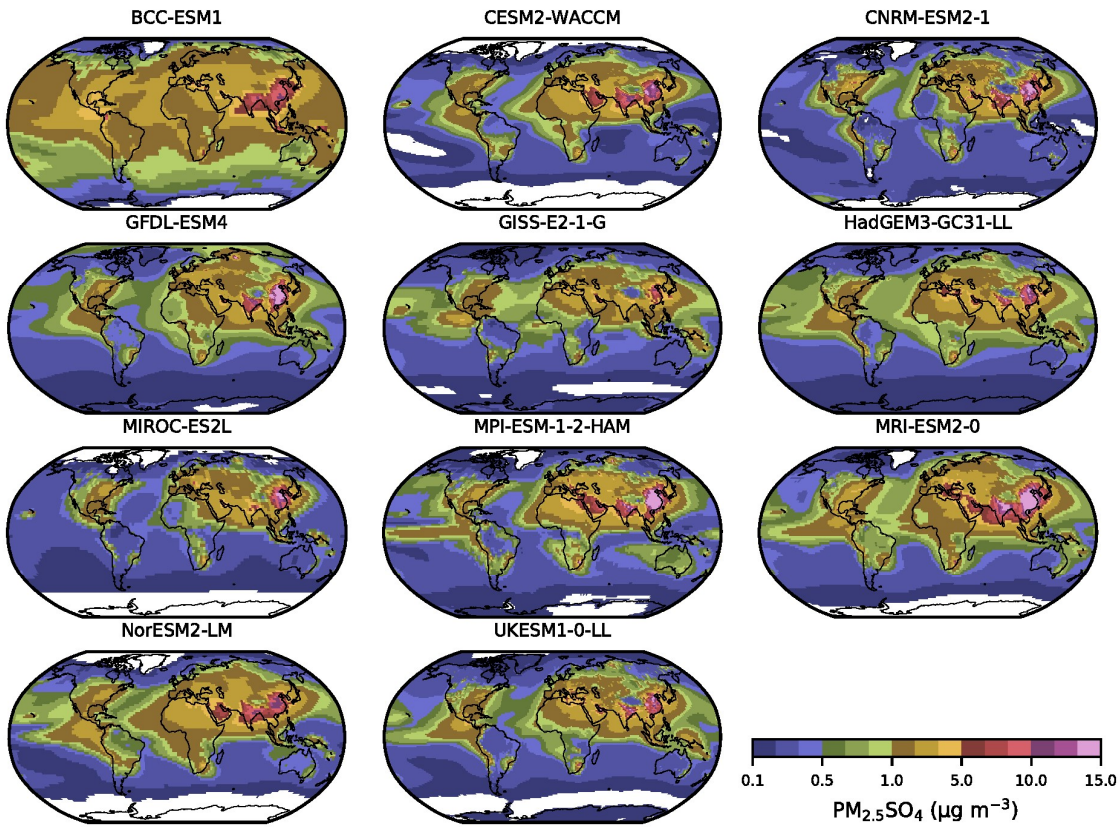

Figure S9 – Annual mean  $PM_{2.5} SO_4$  component calculated for each individual CMIP6 model over the period 2005-2014

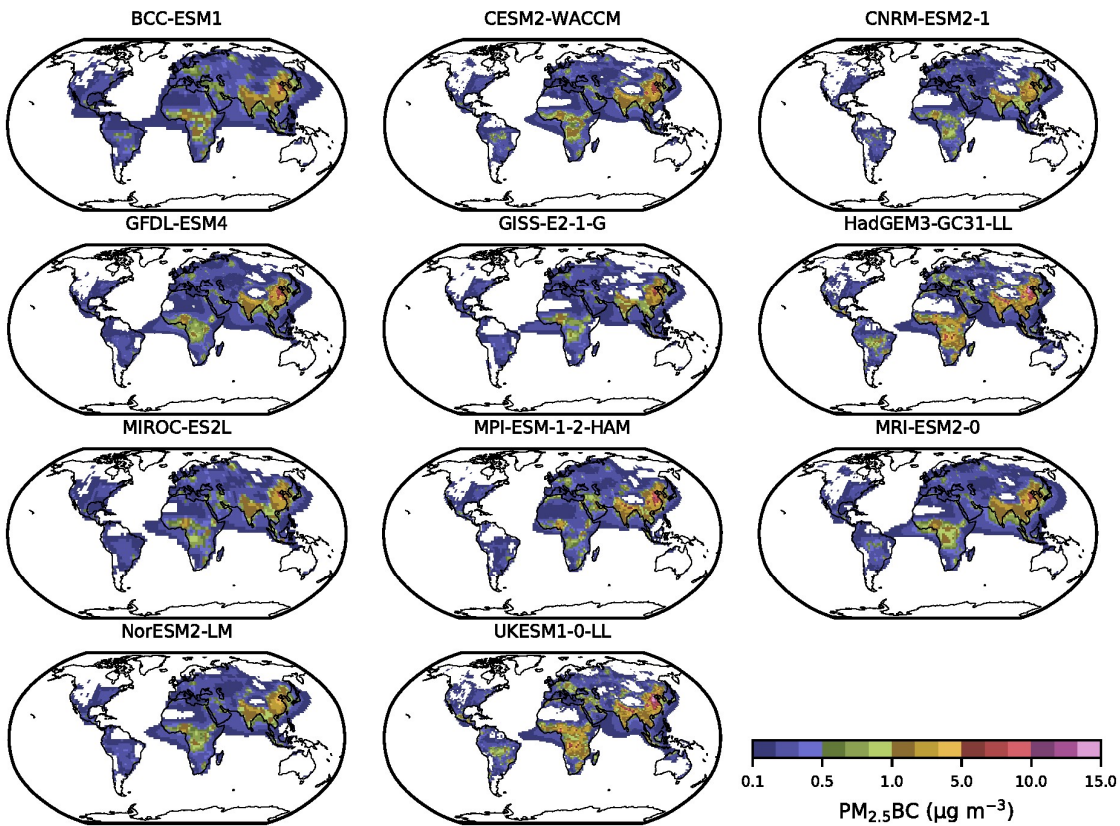

Figure S10 – Annual mean  $PM_{2.5} BC$  component calculated for each individual CMIP6 model over the period 2005-2014



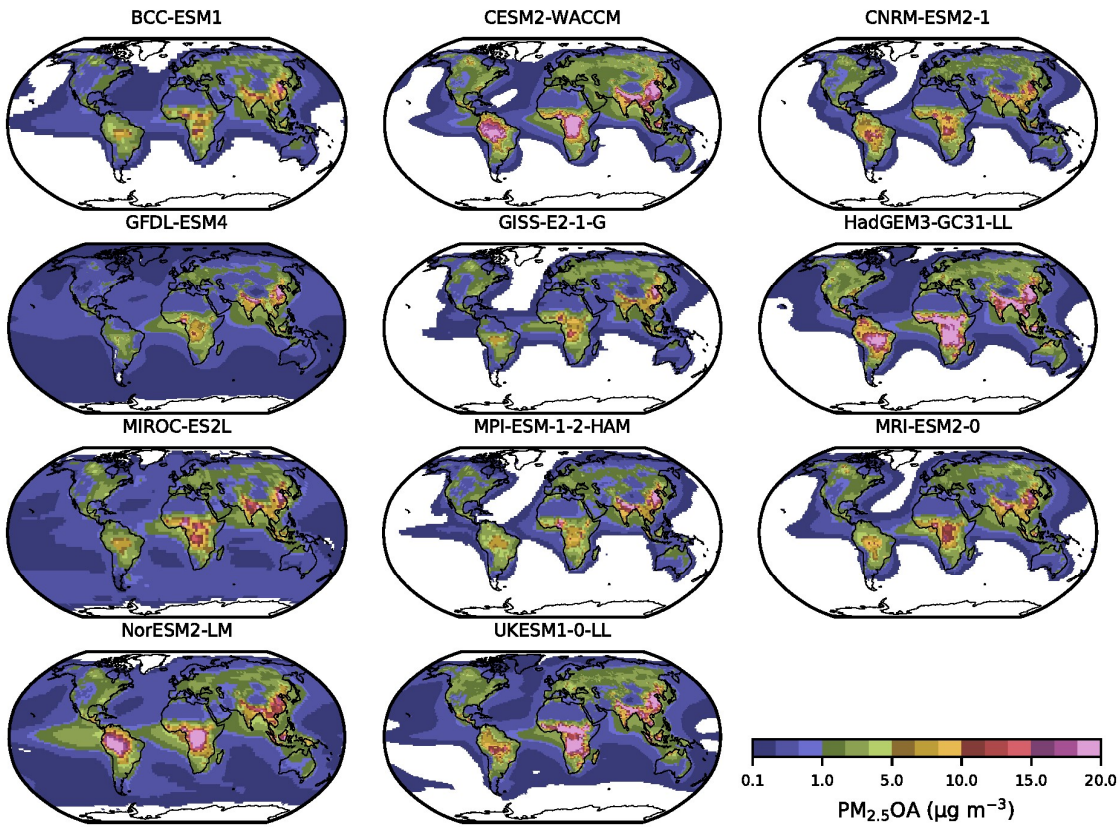

80

Figure S11 – Annual mean  $PM_{2.5}$  OA component calculated for each individual CMIP6 model over the period 2005-2014

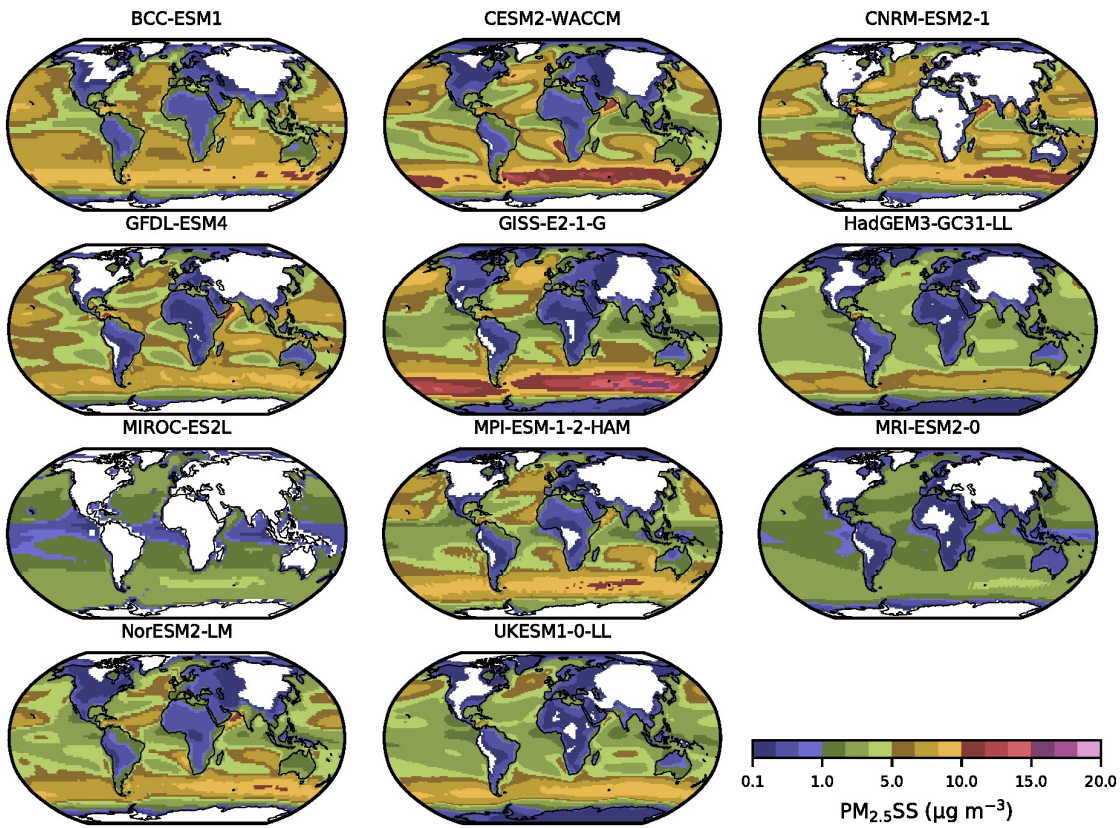

Figure S12 – Annual mean  $PM_{2.5}$  SS (sea salt) component calculated for each individual CMIP6 model over the period 2005-2014

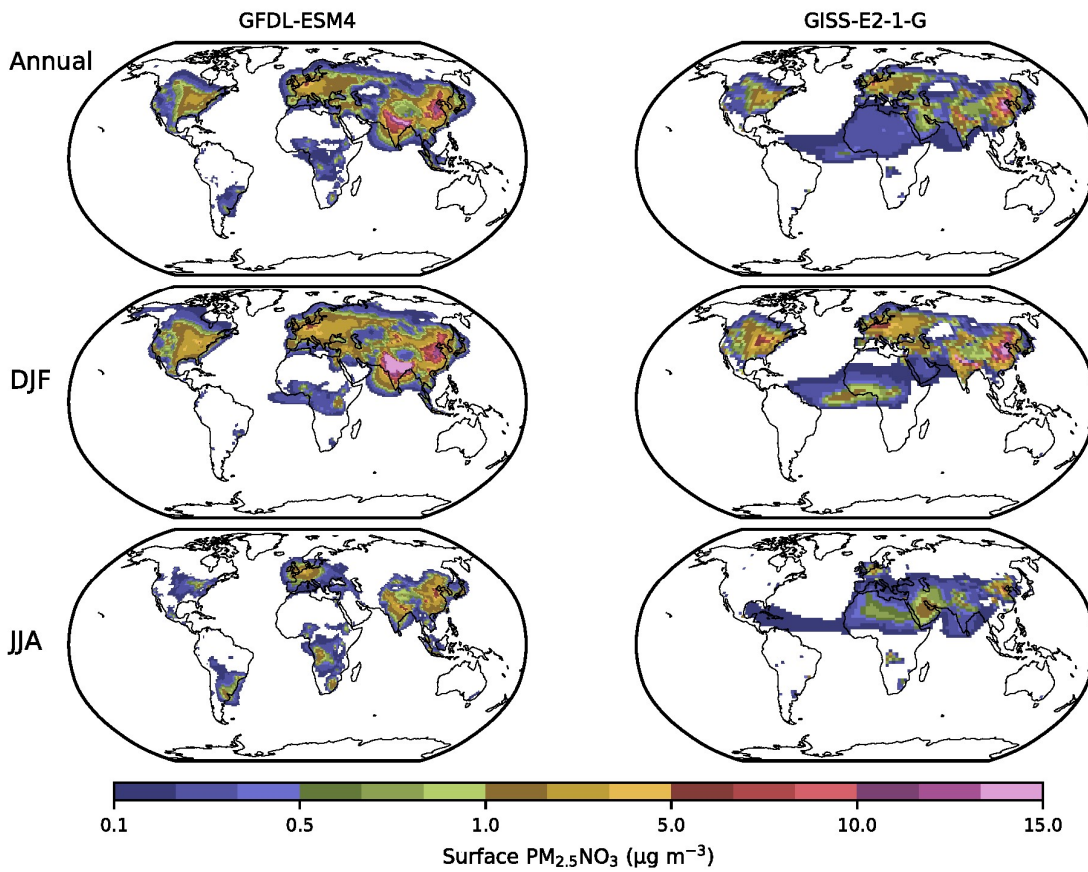

85 Figure S13 – Annual and seasonal mean  $PM_{2.5}NO_3$  (nitrate) component calculated for each individual CMIP6 model that made the data available over the period 2005-2014

2005-14

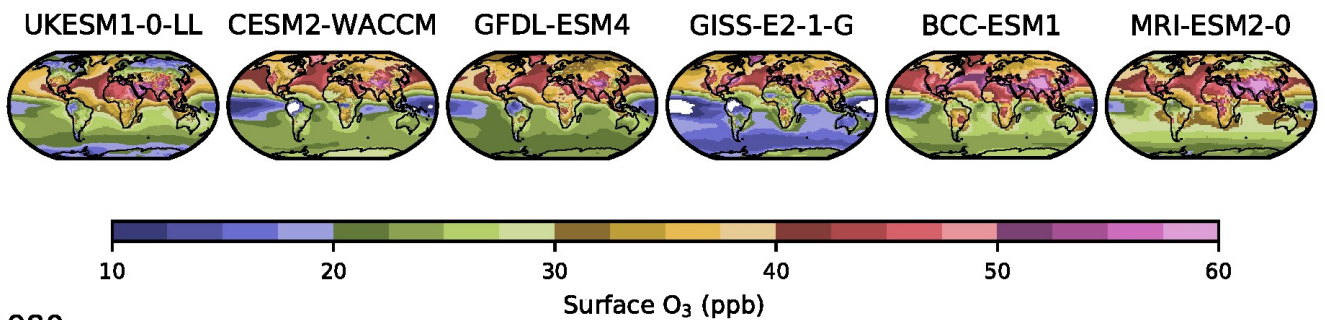

1980

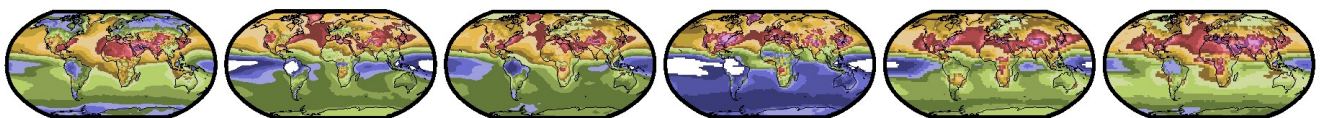

1850

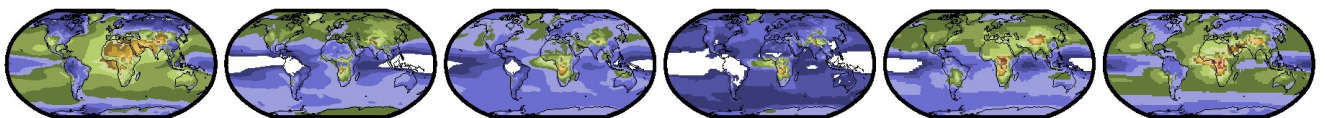

Figure S14 - Annual mean surface  $O_3$  concentrations across 6 CMIP6 models over the period 2005-2014 (top row), 1980-1989 (middle row) and 1850-1859 (bottom row).



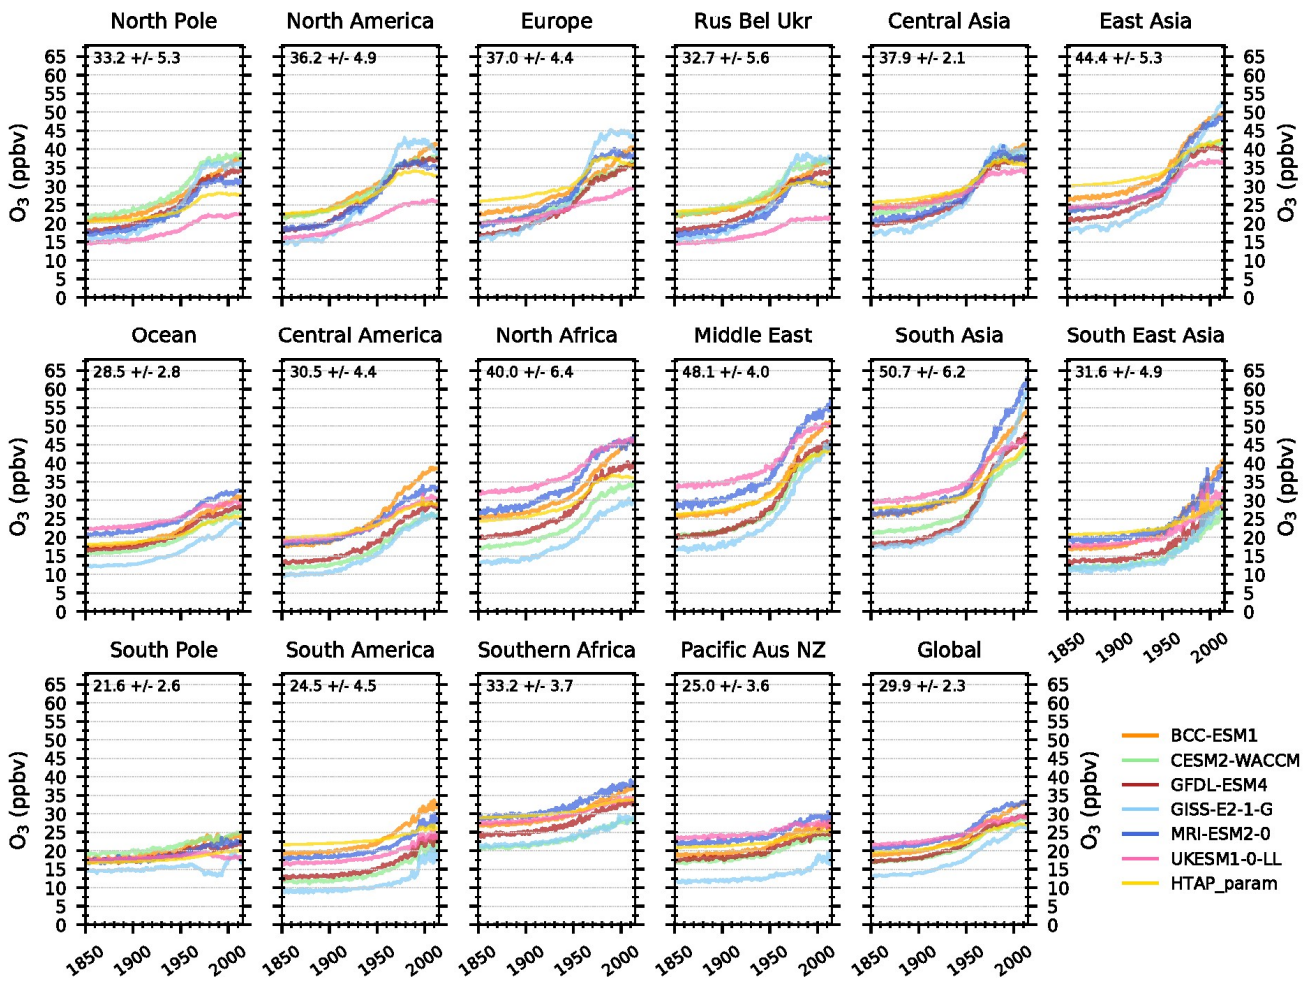

90

Figure S15 - Regional and global annual mean surface O<sub>3</sub> concentrations across 6 CMIP6 models and the HTAP\_param. The multi-model annual mean year 2005-2014 surface O<sub>3</sub> concentrations (+/- 1 standard deviation) are shown in the top left of each panel. Regions are defined in Figure S1.

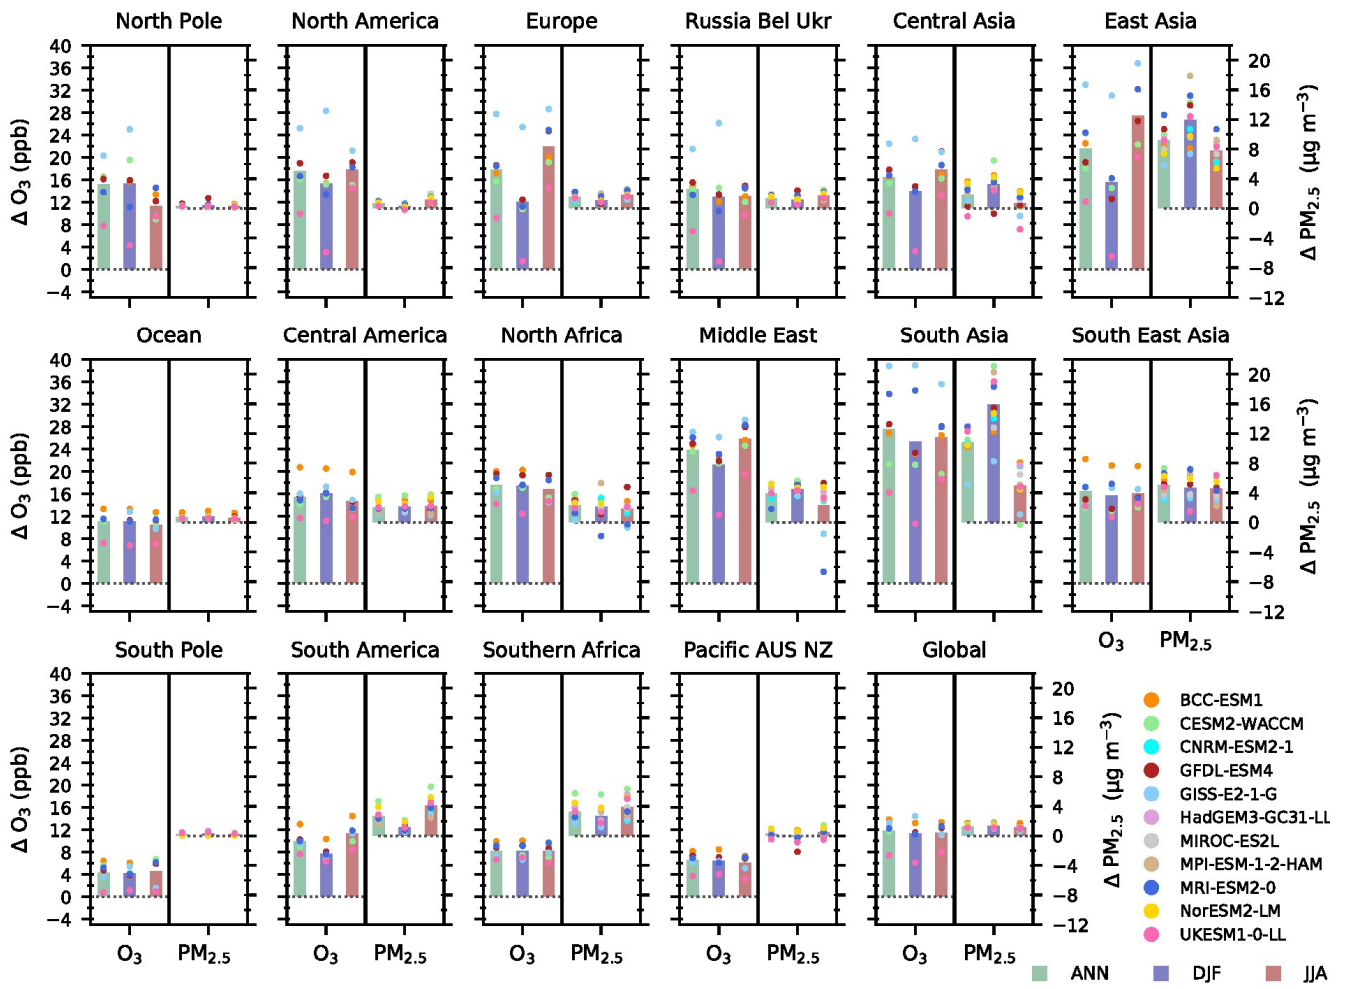

95 Figure S16 – Annual and seasonal regional mean changes in surface  $O_3$  and  $PM_{2.5}$  from pre-industrial (1850-1859 mean) to present day (2005-2014 mean) across 11 CMIP6 models for  $PM_{2.5}$  and 6 models for  $O_3$ . Individual circles represent each annual and seasonal mean change from individual CMIP6 models, with the multi-model mean represented by the solid bar.

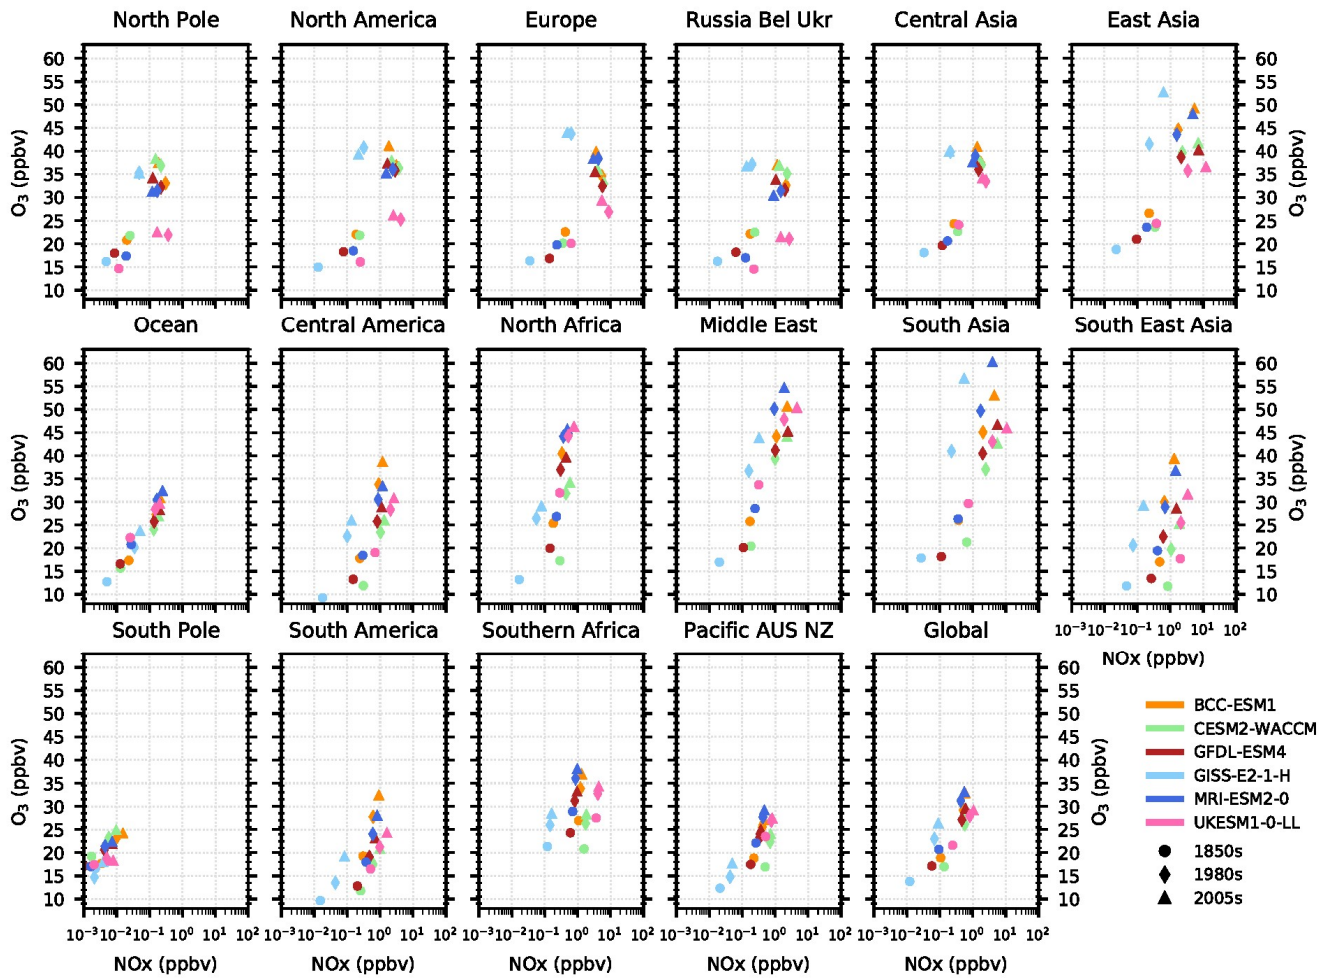

100 Figure S17 – Annual mean regional surface  $O_3$  concentrations compared to regional annual mean surface  $NO_x$  ( $NO + NO_2$ ) concentrations across 6 CMIP6 models over three ten-year periods of 1850-1859 (circles), 1980-1989 (diamonds) and 2005-2014 (triangle).

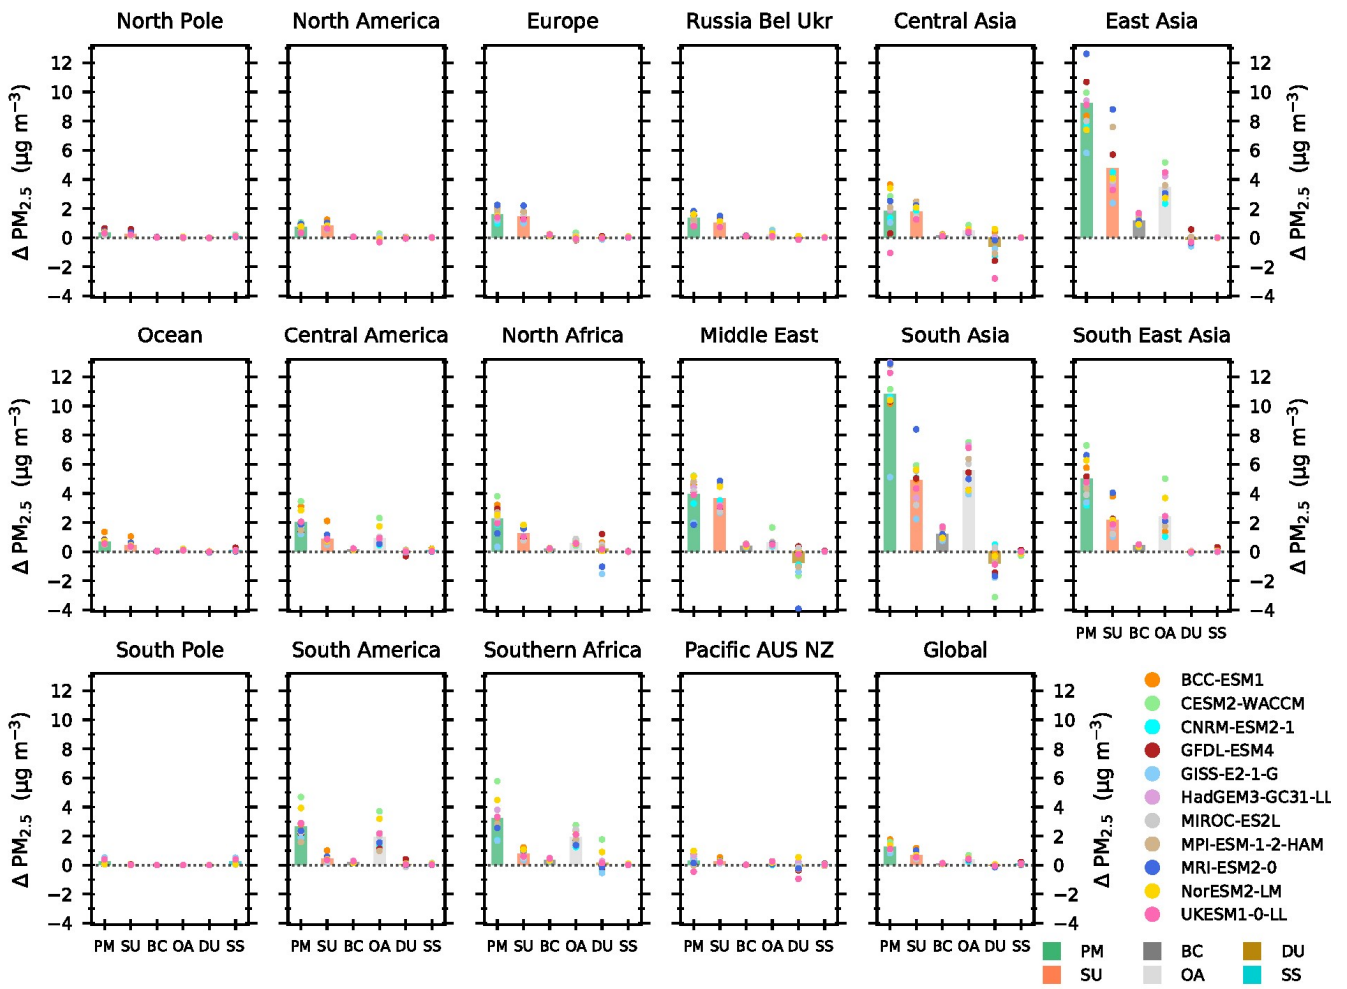

105 Figure S18 – Pre-industrial (1850-1859 mean) to present day (2005-2014 mean) changes in the regional and global annual mean surface  $PM_{2.5}$  concentrations (PM) and that from each individual component (BC – black carbon, DU – dust, SU – sulphate, OA – organic aerosol and SS – sea salt). Individual circles represent each annual and seasonal mean changes from the 11 individual CMIP6 models, with the multi-model mean represented by the solid bar. The Regions are defined in Figure S1.



2005-14

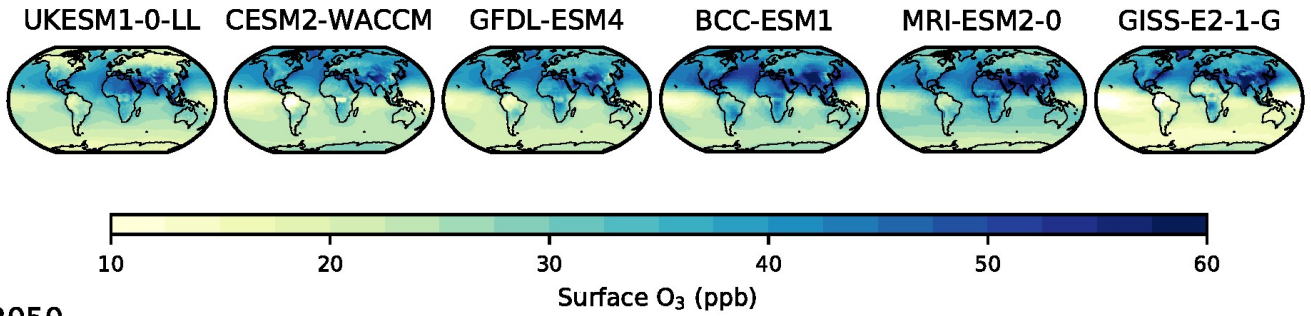

2050

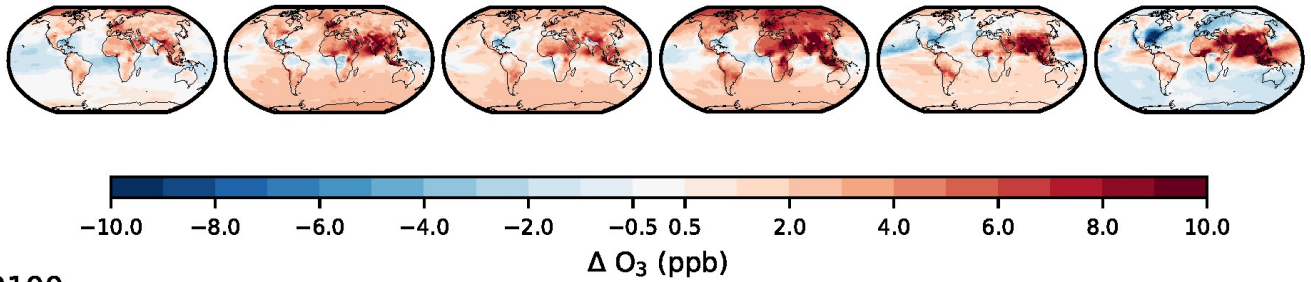

2100

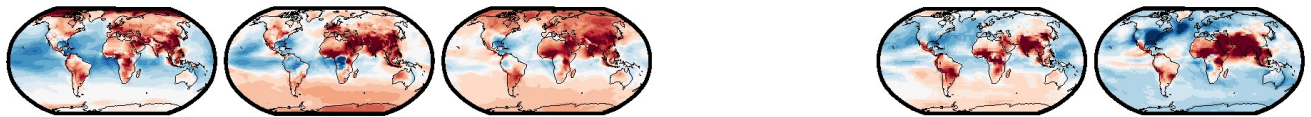

110 Figure S19 – Annual mean surface O<sub>3</sub> concentrations and future response in ssp370 across 6 different CMIP6 models. Top row shows the 2005-2014 annual mean surface O<sub>3</sub> concentrations in each model from the historical simulations. Middle row shows the surface O<sub>3</sub> response in 2050, relative to 2005-2014 mean, in each model for ssp370. Bottom row shows the same as the middle but for 2100. No data is presented in 2100 for BCC-ESM1 as data for ssp370 only extended out to 2055.

2005-14

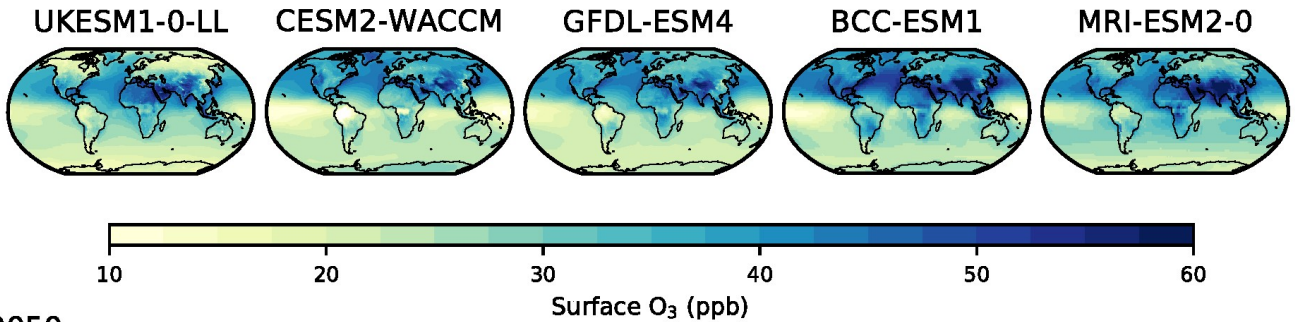

2050

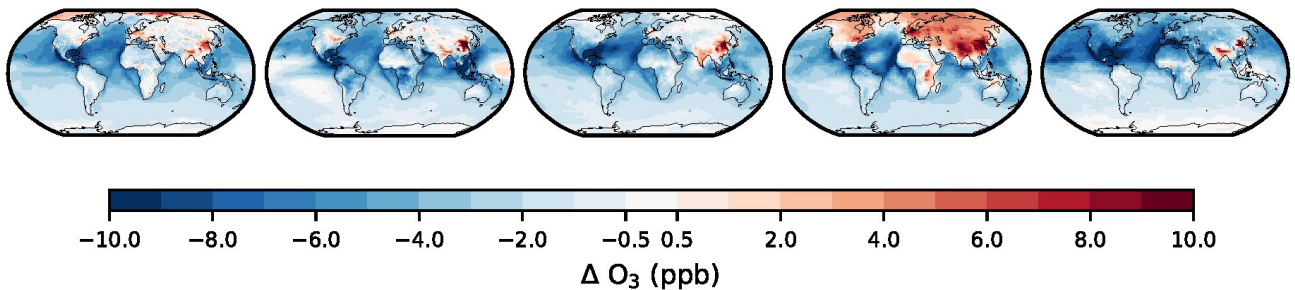

115 Figure S20 - Annual mean surface O<sub>3</sub> concentrations and future response in ssp370-lowNTCF across five different CMIP6 models. Top row shows the 2005-2014 annual mean surface O<sub>3</sub> concentrations in each model from the historical simulations. Bottom row shows the surface O<sub>3</sub> response in 2050, relative to the 2005-2014 mean, in each model for ssp370-lowNTCF.

2005-14

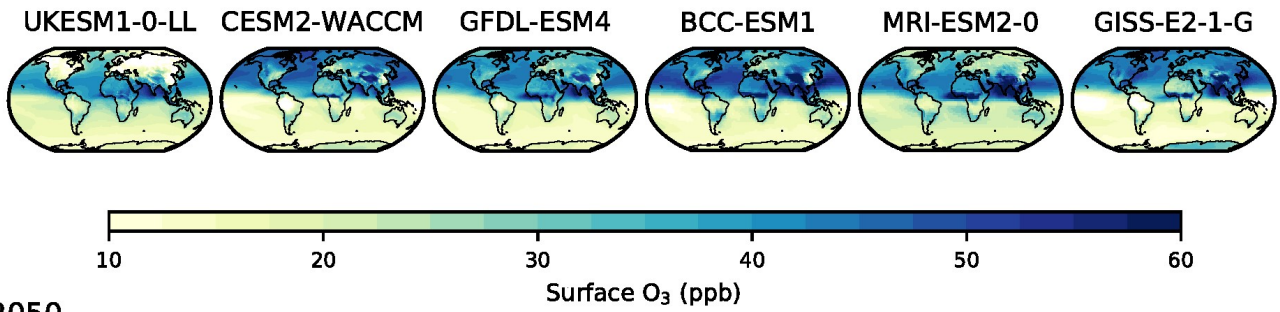

2050

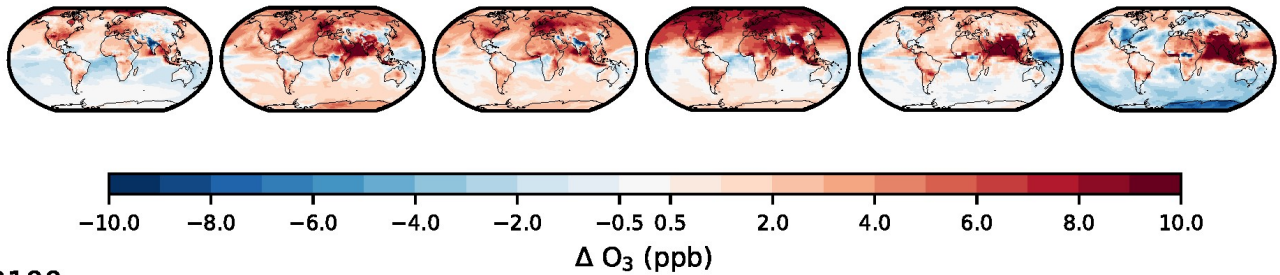

2100

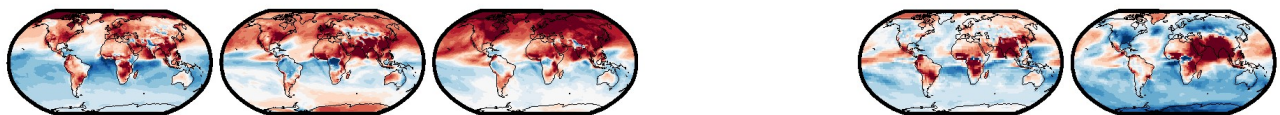

120 Figure S21 – December January February (DJF) mean surface O<sub>3</sub> concentrations and future response in ssp370 across 6 different CMIP6 models. Top row shows the 2005-2014 DJF mean surface O<sub>3</sub> concentrations in each model from the historical simulations. Middle row shows the surface DJF O<sub>3</sub> response in 2050, relative to 2005-2014 mean, in each model for ssp370. Bottom row shows the same as the middle but for 2100. No data is presented in 2100 for BCC-ESM1 as data for ssp370 only extended out to 2055.

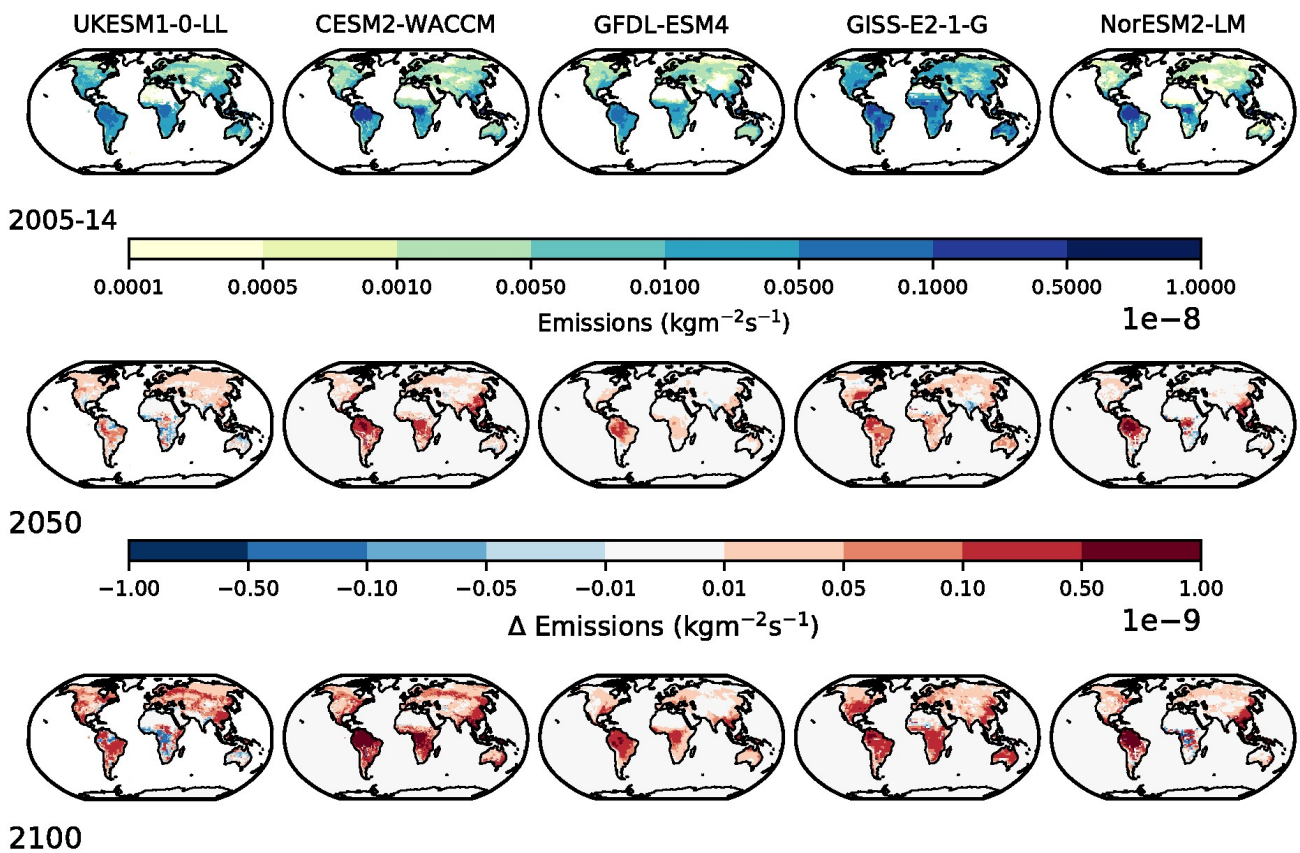

125 Figure S22 – Annual mean emissions of total biogenic volatile organic compounds across 5 CMIP6 models. Top row shows the 2005-2014 annual mean emissions in each model from the historical simulations. Middle row shows the change in emissions in 2050, relative to 2005-2014 mean, in each model for ssp370. Bottom row shows the same as the middle but for 2100. The total BVOC emissions from each model includes a different number of individual BVOC species (Table S1).



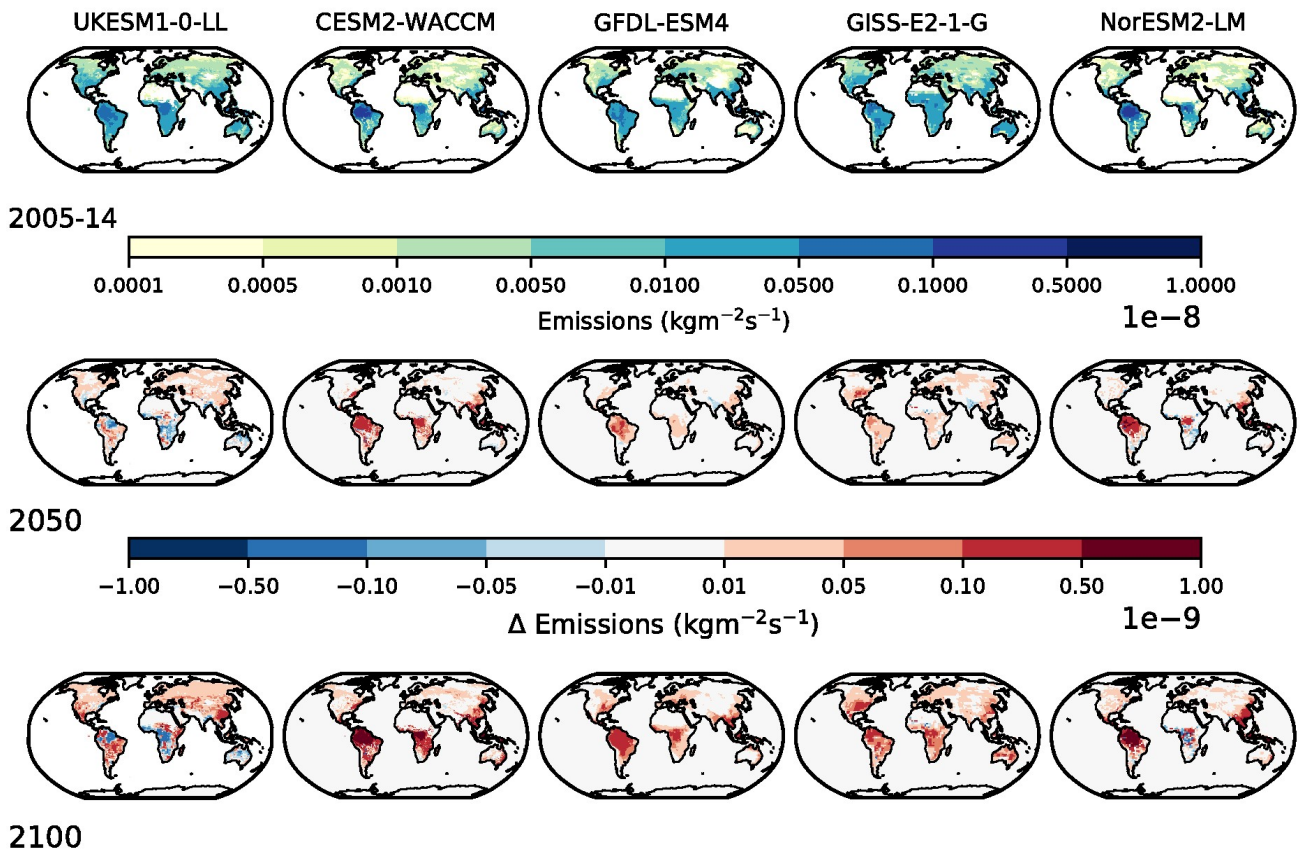

Figure S23 – Annual mean emissions of isoprene across 5 CMIP6 models. Top row shows the 2005-2014 annual mean emissions in each model from the historical simulations. Middle row shows the change in emissions in 2050, relative to 2005-2014 mean, in each model for ssp370. Bottom row shows the same as the middle but for 2100.

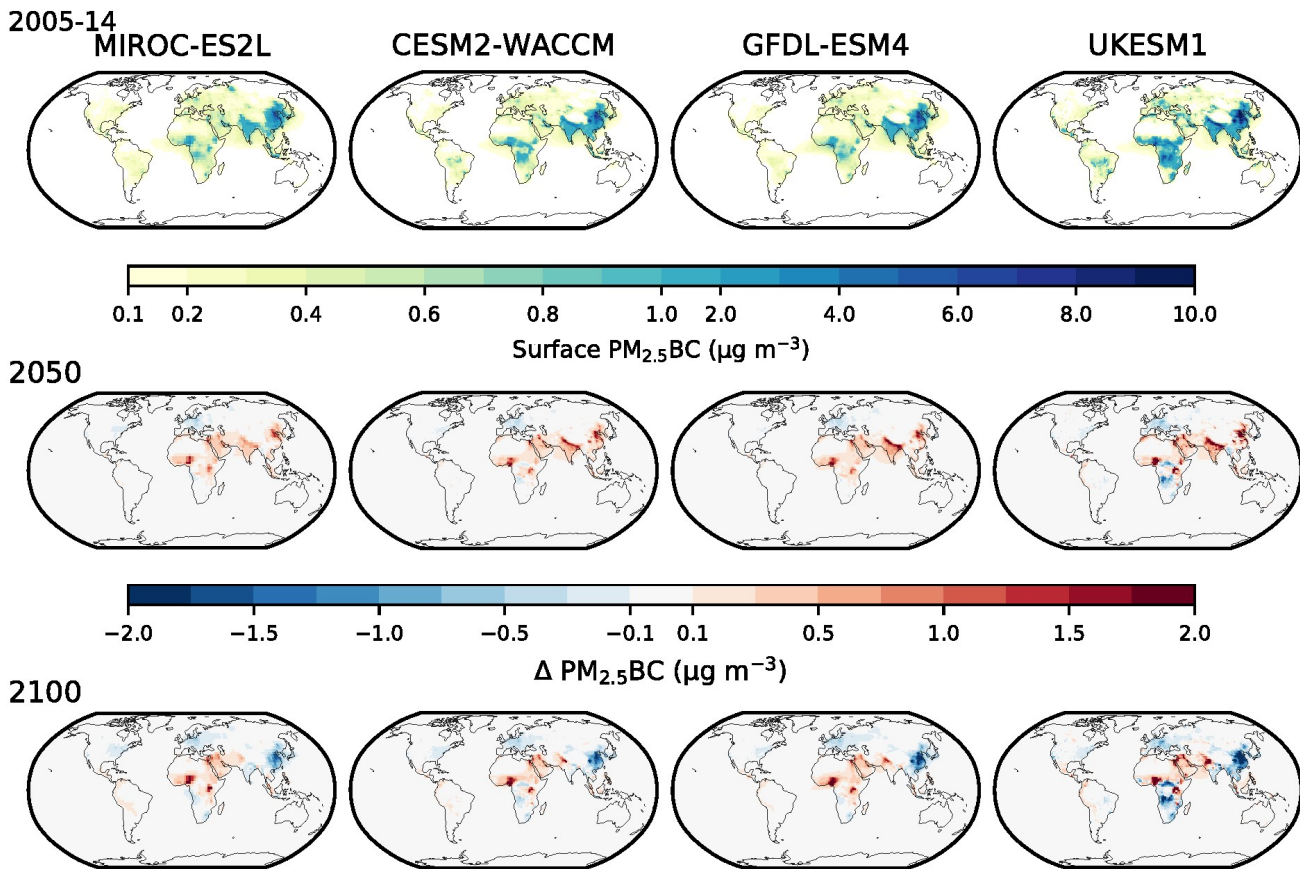

Figure S24 – Annual mean surface PM<sub>2.5</sub> black carbon concentrations and future response in ssp370 across four different CMIP6 models. Top row shows the 2005-2014 annual mean surface PM<sub>2.5</sub> black carbon concentrations in each model from the historical simulations. Middle row shows the decadal mean surface PM<sub>2.5</sub> black carbon response in 2050 (2045-2055), relative to 2005-2014 mean, in each model for ssp370. Bottom row shows the same as the middle but for 2095 (2090-2100).

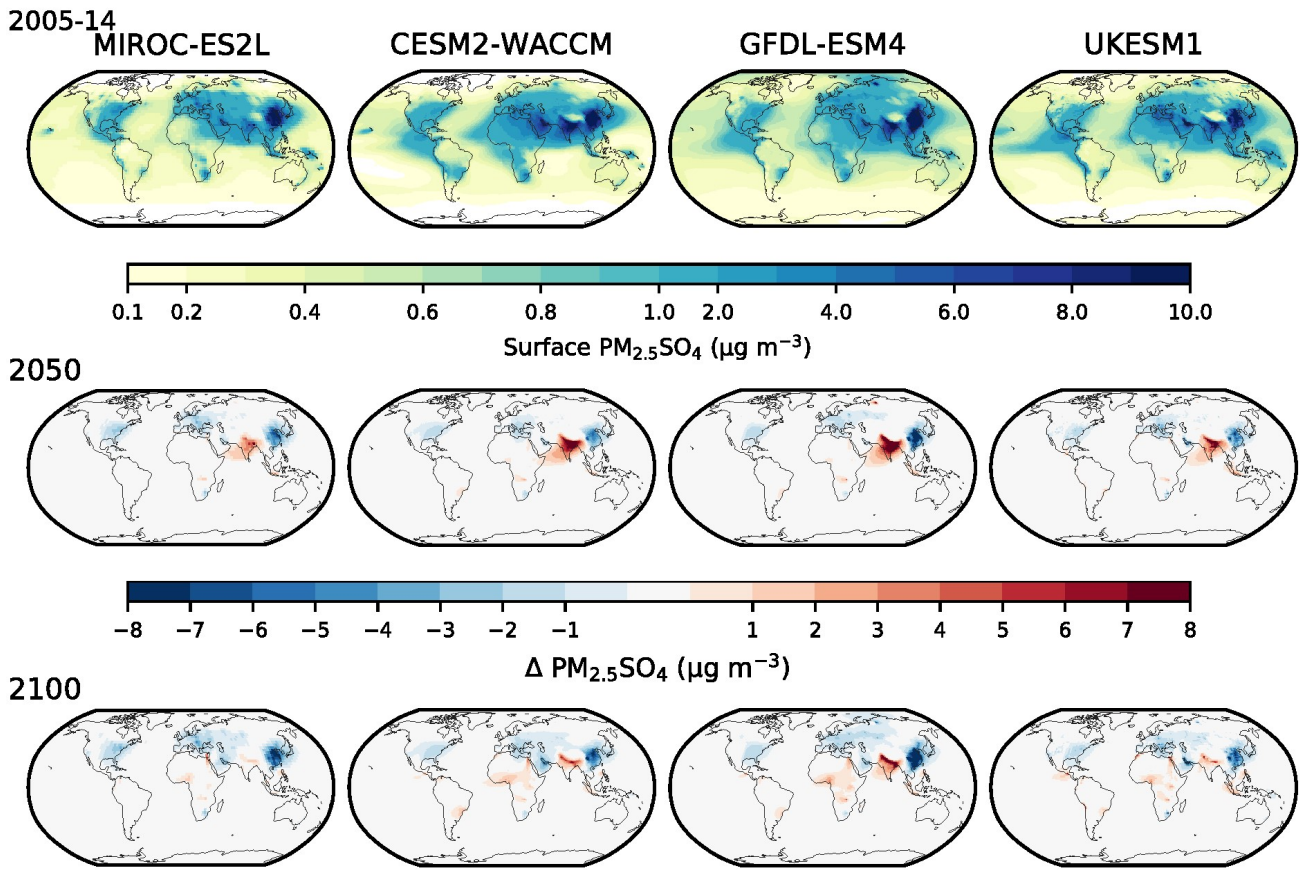

135

Figure S25 – same as Fig S24 but for  $PM_{2.5}$  sulphate

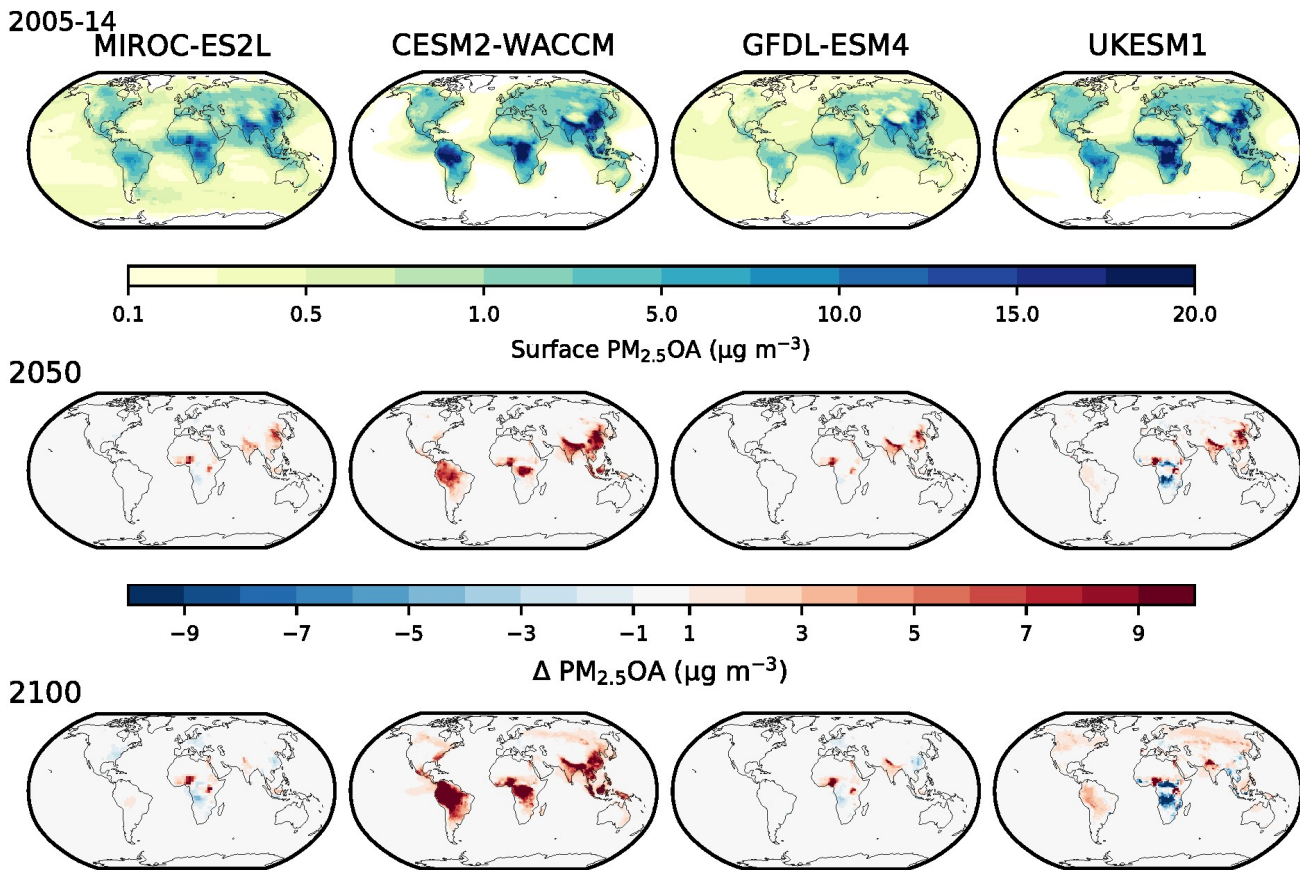

Figure S26 – same as Fig S24 but for  $PM_{2.5}$  organic aerosol



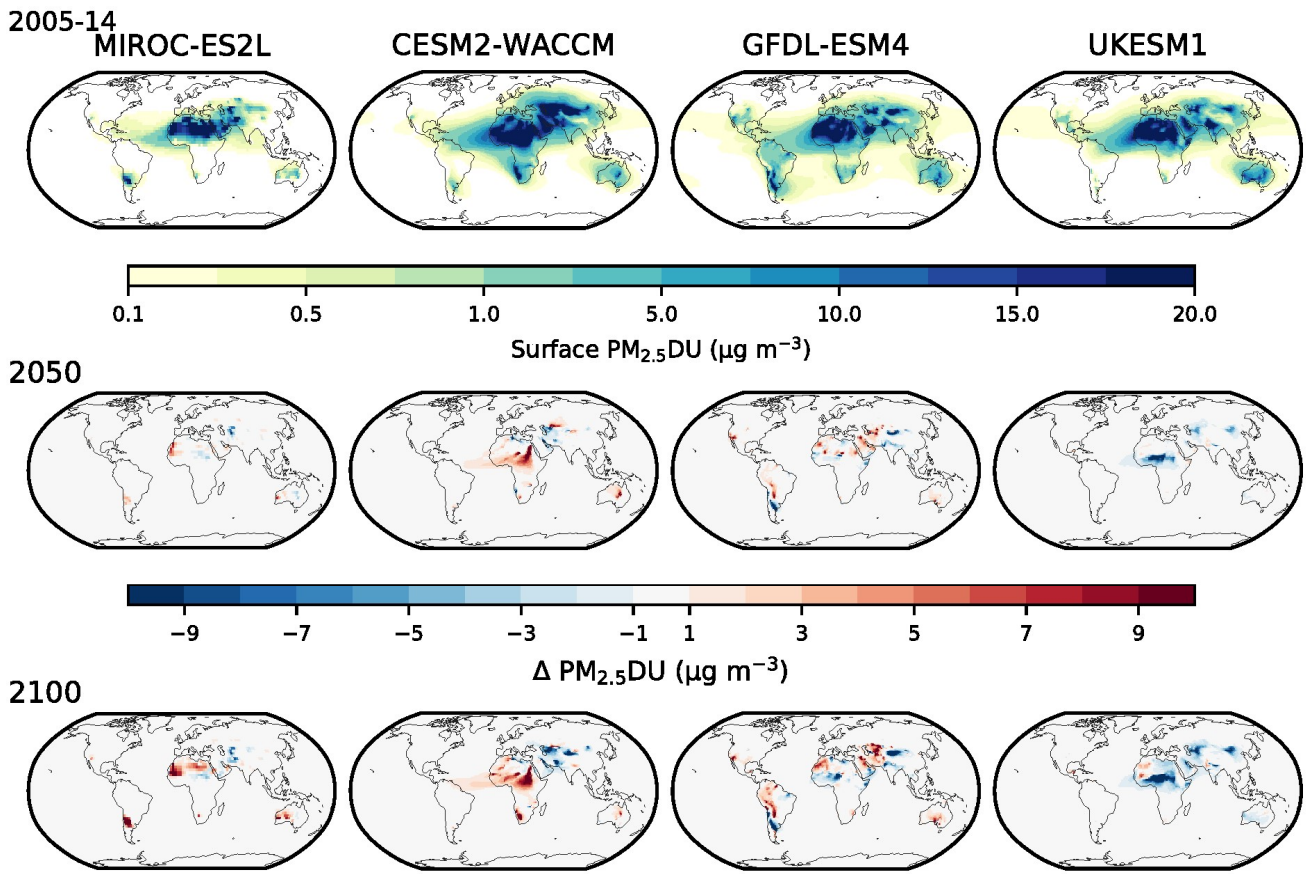

140 Figure S27 – same as Fig S24 but for  $PM_{2.5}$  dust

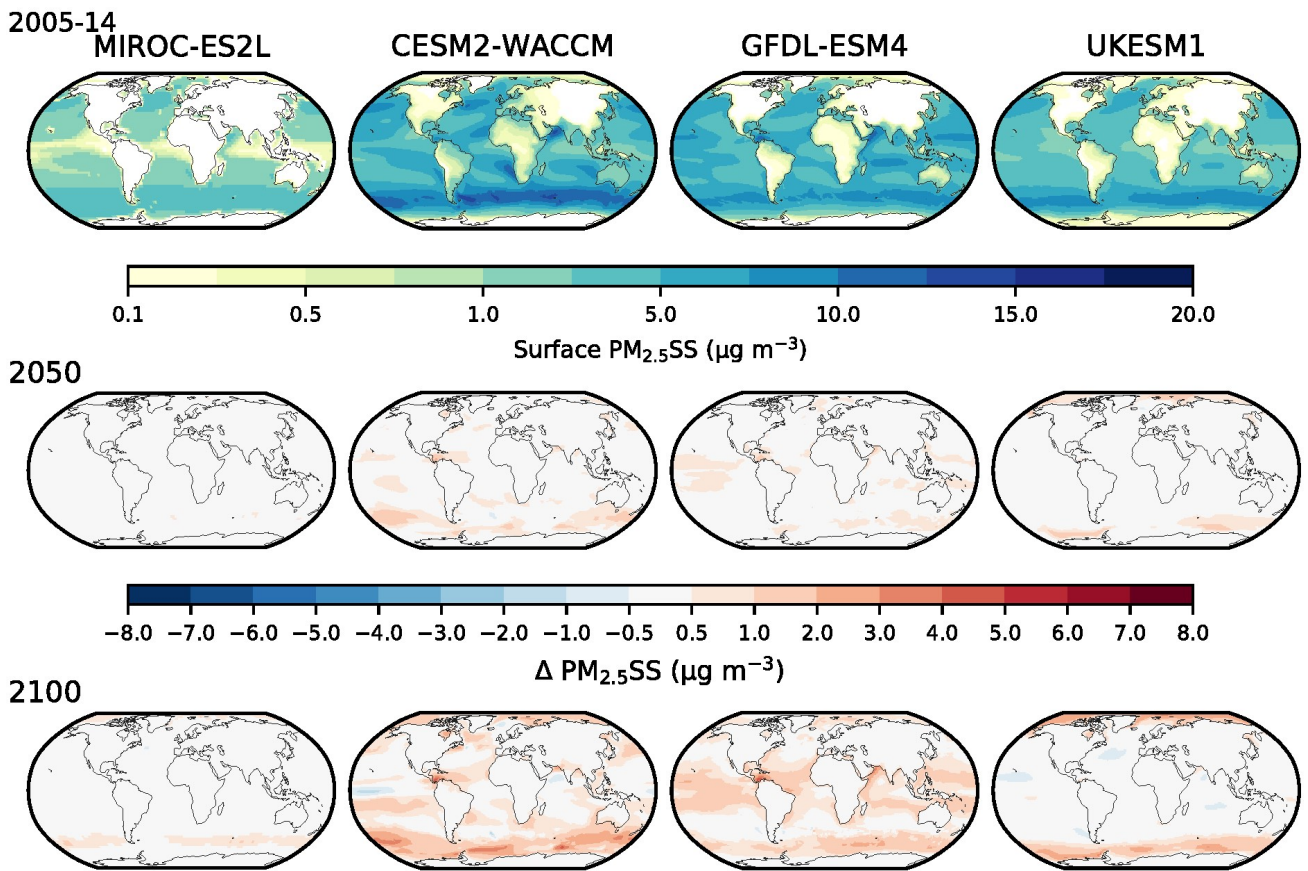

Figure S28 – same as Fig S24 but for  $PM_{2.5}$  sea salt
